# Supplementary material
Source: ML conference proceedings conference paper supplement (https://proceedings.mlr.press/v139/xie21c.html)
Supplement: Supplementary file 2 [file xie21c-supp.zip]

Archive with 3,188 entries (3,013 files):
- supplement/
- __MACOSX/._supplement
- supplement/supp.pdf
- supplement/.DS_Store
- __MACOSX/supplement/._.DS_Store
- supplement/code/
- __MACOSX/supplement/._code
- supplement/code/.Rhistory
- supplement/code/.DS_Store
- __MACOSX/supplement/code/._.DS_Store
- supplement/code/metaworld/
- __MACOSX/supplement/code/._metaworld
- supplement/code/README.md
- __MACOSX/supplement/code/._README.md
- supplement/code/scripts/
- __MACOSX/supplement/code/._scripts
- supplement/code/softlearning/
- __MACOSX/supplement/code/._softlearning
- supplement/code/gym/
- __MACOSX/supplement/code/._gym
- supplement/code/metaworld/docker/
- __MACOSX/supplement/code/metaworld/._docker
- supplement/code/metaworld/LICENSE
- __MACOSX/supplement/code/metaworld/._LICENSE
- supplement/code/metaworld/Makefile
- __MACOSX/supplement/code/metaworld/._Makefile
- supplement/code/metaworld/tests/
- __MACOSX/supplement/code/metaworld/._tests
- supplement/code/metaworld/metaworld/
- __MACOSX/supplement/code/metaworld/._metaworld
- supplement/code/metaworld/MANIFEST.in
- __MACOSX/supplement/code/metaworld/._MANIFEST.in
- supplement/code/metaworld/setup.py
- __MACOSX/supplement/code/metaworld/._setup.py
- supplement/code/metaworld/CONTRIBUTING.md
- __MACOSX/supplement/code/metaworld/._CONTRIBUTING.md
- supplement/code/metaworld/scripts/
- __MACOSX/supplement/code/metaworld/._scripts
- supplement/code/metaworld/.travis.yml
- __MACOSX/supplement/code/metaworld/._.travis.yml
- supplement/code/metaworld/metaworld.egg-info/
- __MACOSX/supplement/code/metaworld/._metaworld.egg-info
- supplement/code/scripts/run_sawyer.sh
- __MACOSX/supplement/code/scripts/._run_sawyer.sh
- supplement/code/scripts/run_hc_windvel.sh
- __MACOSX/supplement/code/scripts/._run_hc_windvel.sh
- supplement/code/scripts/run_minitaur.sh
- __MACOSX/supplement/code/scripts/._run_minitaur.sh
- supplement/code/scripts/run_hc_vel.sh
- __MACOSX/supplement/code/scripts/._run_hc_vel.sh
- supplement/code/softlearning/docker/
- __MACOSX/supplement/code/softlearning/._docker
- supplement/code/softlearning/LICENSE
- __MACOSX/supplement/code/softlearning/._LICENSE
- supplement/code/softlearning/requirements.txt
- __MACOSX/supplement/code/softlearning/._requirements.txt
- supplement/code/softlearning/environment.yml
- __MACOSX/supplement/code/softlearning/._environment.yml
- supplement/code/softlearning/config/
- __MACOSX/supplement/code/softlearning/._config
- supplement/code/softlearning/tests/
- __MACOSX/supplement/code/softlearning/._tests
- supplement/code/softlearning/models/
- __MACOSX/supplement/code/softlearning/._models
- supplement/code/softlearning/setup.py
- __MACOSX/supplement/code/softlearning/._setup.py
- supplement/code/softlearning/.dockerignore
- __MACOSX/supplement/code/softlearning/._.dockerignore
- supplement/code/softlearning/.env
- __MACOSX/supplement/code/softlearning/._.env
- supplement/code/softlearning/examples/
- __MACOSX/supplement/code/softlearning/._examples
- supplement/code/softlearning/scripts/
- __MACOSX/supplement/code/softlearning/._scripts
- supplement/code/softlearning/softlearning/
- __MACOSX/supplement/code/softlearning/._softlearning
- supplement/code/softlearning/softlearning.egg-info/
- __MACOSX/supplement/code/softlearning/._softlearning.egg-info
- supplement/code/gym/LICENSE.md
- __MACOSX/supplement/code/gym/._LICENSE.md
- supplement/code/gym/bin/
- __MACOSX/supplement/code/gym/._bin
- supplement/code/gym/tests/
- __MACOSX/supplement/code/gym/._tests
- supplement/code/gym/gym.egg-info/
- __MACOSX/supplement/code/gym/._gym.egg-info
- supplement/code/gym/docs/
- __MACOSX/supplement/code/gym/._docs
- supplement/code/gym/py.Dockerfile
- __MACOSX/supplement/code/gym/._py.Dockerfile
- supplement/code/gym/setup.py
- __MACOSX/supplement/code/gym/._setup.py
- supplement/code/gym/.dockerignore
- __MACOSX/supplement/code/gym/._.dockerignore
- supplement/code/gym/examples/
- __MACOSX/supplement/code/gym/._examples
- supplement/code/gym/scripts/
- __MACOSX/supplement/code/gym/._scripts
- supplement/code/gym/gym/
- __MACOSX/supplement/code/gym/._gym
- supplement/code/gym/README.rst
- __MACOSX/supplement/code/gym/._README.rst
- supplement/code/gym/.travis.yml
- __MACOSX/supplement/code/gym/._.travis.yml
- supplement/code/gym/vendor/
- __MACOSX/supplement/code/gym/._vendor
- supplement/code/gym/CODE_OF_CONDUCT.rst
- __MACOSX/supplement/code/gym/._CODE_OF_CONDUCT.rst
- supplement/code/metaworld/docker/entrypoint-headless.sh
- __MACOSX/supplement/code/metaworld/docker/._entrypoint-headless.sh
- supplement/code/metaworld/docker/Dockerfile
- __MACOSX/supplement/code/metaworld/docker/._Dockerfile
- supplement/code/metaworld/docker/README.md
- __MACOSX/supplement/code/metaworld/docker/._README.md
- supplement/code/metaworld/docker/docker-compose.yml
- __MACOSX/supplement/code/metaworld/docker/._docker-compose.yml
- supplement/code/metaworld/tests/integration/
- __MACOSX/supplement/code/metaworld/tests/._integration
- supplement/code/metaworld/tests/metaworld/
- __MACOSX/supplement/code/metaworld/tests/._metaworld
- supplement/code/metaworld/tests/__init__.py
- __MACOSX/supplement/code/metaworld/tests/.___init__.py
- supplement/code/metaworld/tests/helpers.py
- __MACOSX/supplement/code/metaworld/tests/._helpers.py
- supplement/code/metaworld/metaworld/core/
- __MACOSX/supplement/code/metaworld/metaworld/._core
- supplement/code/metaworld/metaworld/__init__.py
- __MACOSX/supplement/code/metaworld/metaworld/.___init__.py
- supplement/code/metaworld/metaworld/__pycache__/
- __MACOSX/supplement/code/metaworld/metaworld/.___pycache__
- supplement/code/metaworld/metaworld/benchmarks/
- __MACOSX/supplement/code/metaworld/metaworld/._benchmarks
- supplement/code/metaworld/metaworld/envs/
- __MACOSX/supplement/code/metaworld/metaworld/._envs
- supplement/code/metaworld/scripts/demo_sawyer.py
- __MACOSX/supplement/code/metaworld/scripts/._demo_sawyer.py
- supplement/code/metaworld/scripts/grasp.py
- __MACOSX/supplement/code/metaworld/scripts/._grasp.py
- supplement/code/metaworld/scripts/keyboard_control.py
- __MACOSX/supplement/code/metaworld/scripts/._keyboard_control.py
- supplement/code/metaworld/scripts/profile_memory_usage.py
- __MACOSX/supplement/code/metaworld/scripts/._profile_memory_usage.py
- supplement/code/metaworld/scripts/mouse_control.py
- __MACOSX/supplement/code/metaworld/scripts/._mouse_control.py
- supplement/code/metaworld/metaworld.egg-info/PKG-INFO
- __MACOSX/supplement/code/metaworld/metaworld.egg-info/._PKG-INFO
- supplement/code/metaworld/metaworld.egg-info/SOURCES.txt
- __MACOSX/supplement/code/metaworld/metaworld.egg-info/._SOURCES.txt
- supplement/code/metaworld/metaworld.egg-info/requires.txt
- __MACOSX/supplement/code/metaworld/metaworld.egg-info/._requires.txt
- supplement/code/metaworld/metaworld.egg-info/top_level.txt
- __MACOSX/supplement/code/metaworld/metaworld.egg-info/._top_level.txt
- supplement/code/metaworld/metaworld.egg-info/dependency_links.txt
- __MACOSX/supplement/code/metaworld/metaworld.egg-info/._dependency_links.txt
- supplement/code/softlearning/docker/docker-compose.dev.cpu.yml
- __MACOSX/supplement/code/softlearning/docker/._docker-compose.dev.cpu.yml
- supplement/code/softlearning/docker/docker-compose.cloud.yml
- __MACOSX/supplement/code/softlearning/docker/._docker-compose.cloud.yml
- supplement/code/softlearning/docker/docker-compose.dev.gpu.yml
- __MACOSX/supplement/code/softlearning/docker/._docker-compose.dev.gpu.yml
- supplement/code/softlearning/docker/cloudbuild.yaml
- __MACOSX/supplement/code/softlearning/docker/._cloudbuild.yaml
- supplement/code/softlearning/docker/entrypoint.sh
- __MACOSX/supplement/code/softlearning/docker/._entrypoint.sh
- supplement/code/softlearning/docker/Dockerfile.softlearning.base.cpu
- __MACOSX/supplement/code/softlearning/docker/._Dockerfile.softlearning.base.cpu
- supplement/code/softlearning/docker/Dockerfile.softlearning
- __MACOSX/supplement/code/softlearning/docker/._Dockerfile.softlearning
- supplement/code/softlearning/docker/Dockerfile.softlearning.base.gpu
- __MACOSX/supplement/code/softlearning/docker/._Dockerfile.softlearning.base.gpu
- supplement/code/softlearning/config/ray-autoscaler-ec2.yaml
- __MACOSX/supplement/code/softlearning/config/._ray-autoscaler-ec2.yaml
- supplement/code/softlearning/config/ray-autoscaler-gce.yaml
- __MACOSX/supplement/code/softlearning/config/._ray-autoscaler-gce.yaml
- supplement/code/softlearning/config/locals
- __MACOSX/supplement/code/softlearning/config/._locals
- supplement/code/softlearning/tests/__init__.py
- __MACOSX/supplement/code/softlearning/tests/.___init__.py
- supplement/code/softlearning/tests/softlearning/
- __MACOSX/supplement/code/softlearning/tests/._softlearning
- supplement/code/softlearning/models/cross_maze_ant.xml
- __MACOSX/supplement/code/softlearning/models/._cross_maze_ant.xml
- supplement/code/softlearning/models/pusher_2d.xml
- __MACOSX/supplement/code/softlearning/models/._pusher_2d.xml
- supplement/code/softlearning/models/simple_maze_ant.xml
- __MACOSX/supplement/code/softlearning/models/._simple_maze_ant.xml
- supplement/code/softlearning/examples/development/
- __MACOSX/supplement/code/softlearning/examples/._development
- supplement/code/softlearning/examples/__init__.py
- __MACOSX/supplement/code/softlearning/examples/.___init__.py
- supplement/code/softlearning/examples/__pycache__/
- __MACOSX/supplement/code/softlearning/examples/.___pycache__
- supplement/code/softlearning/examples/utils.py
- __MACOSX/supplement/code/softlearning/examples/._utils.py
- supplement/code/softlearning/examples/multi_goal/
- __MACOSX/supplement/code/softlearning/examples/._multi_goal
- supplement/code/softlearning/examples/__init__.pyc
- __MACOSX/supplement/code/softlearning/examples/.___init__.pyc
- supplement/code/softlearning/examples/instrument.py
- __MACOSX/supplement/code/softlearning/examples/._instrument.py
- supplement/code/softlearning/scripts/test-cloud-build.sh
- __MACOSX/supplement/code/softlearning/scripts/._test-cloud-build.sh
- supplement/code/softlearning/scripts/deploy-aws.sh
- __MACOSX/supplement/code/softlearning/scripts/._deploy-aws.sh
- supplement/code/softlearning/scripts/__init__.py
- __MACOSX/supplement/code/softlearning/scripts/.___init__.py
- supplement/code/softlearning/scripts/archive_gs.py
- __MACOSX/supplement/code/softlearning/scripts/._archive_gs.py
- supplement/code/softlearning/scripts/sync_gs.py
- __MACOSX/supplement/code/softlearning/scripts/._sync_gs.py
- supplement/code/softlearning/scripts/install_mujoco.py
- __MACOSX/supplement/code/softlearning/scripts/._install_mujoco.py
- supplement/code/softlearning/softlearning/misc/
- __MACOSX/supplement/code/softlearning/softlearning/._misc
- supplement/code/softlearning/softlearning/preprocessors/
- __MACOSX/supplement/code/softlearning/softlearning/._preprocessors
- supplement/code/softlearning/softlearning/replay_pools/
- __MACOSX/supplement/code/softlearning/softlearning/._replay_pools
- supplement/code/softlearning/softlearning/environments/
- __MACOSX/supplement/code/softlearning/softlearning/._environments
- supplement/code/softlearning/softlearning/algorithms/
- __MACOSX/supplement/code/softlearning/softlearning/._algorithms
- supplement/code/softlearning/softlearning/__init__.py
- __MACOSX/supplement/code/softlearning/softlearning/.___init__.py
- supplement/code/softlearning/softlearning/utils/
- __MACOSX/supplement/code/softlearning/softlearning/._utils
- supplement/code/softlearning/softlearning/models/
- __MACOSX/supplement/code/softlearning/softlearning/._models
- supplement/code/softlearning/softlearning/__pycache__/
- __MACOSX/supplement/code/softlearning/softlearning/.___pycache__
- supplement/code/softlearning/softlearning/policies/
- __MACOSX/supplement/code/softlearning/softlearning/._policies
- supplement/code/softlearning/softlearning/value_functions/
- __MACOSX/supplement/code/softlearning/softlearning/._value_functions
- supplement/code/softlearning/softlearning/samplers/
- __MACOSX/supplement/code/softlearning/softlearning/._samplers
- supplement/code/softlearning/softlearning/scripts/
- __MACOSX/supplement/code/softlearning/softlearning/._scripts
- supplement/code/softlearning/softlearning/distributions/
- __MACOSX/supplement/code/softlearning/softlearning/._distributions
- supplement/code/softlearning/softlearning.egg-info/PKG-INFO
- __MACOSX/supplement/code/softlearning/softlearning.egg-info/._PKG-INFO
- supplement/code/softlearning/softlearning.egg-info/zip-safe
- __MACOSX/supplement/code/softlearning/softlearning.egg-info/._zip-safe
- supplement/code/softlearning/softlearning.egg-info/SOURCES.txt
- __MACOSX/supplement/code/softlearning/softlearning.egg-info/._SOURCES.txt
- supplement/code/softlearning/softlearning.egg-info/entry_points.txt
- __MACOSX/supplement/code/softlearning/softlearning.egg-info/._entry_points.txt
- supplement/code/softlearning/softlearning.egg-info/top_level.txt
- __MACOSX/supplement/code/softlearning/softlearning.egg-info/._top_level.txt
- supplement/code/softlearning/softlearning.egg-info/dependency_links.txt
- __MACOSX/supplement/code/softlearning/softlearning.egg-info/._dependency_links.txt
- supplement/code/gym/bin/render.py
- __MACOSX/supplement/code/gym/bin/._render.py
- supplement/code/gym/bin/docker_entrypoint
- __MACOSX/supplement/code/gym/bin/._docker_entrypoint
- supplement/code/gym/tests/__init__.py
- __MACOSX/supplement/code/gym/tests/.___init__.py
- supplement/code/gym/tests/gym/
- __MACOSX/supplement/code/gym/tests/._gym
- supplement/code/gym/gym.egg-info/PKG-INFO
- __MACOSX/supplement/code/gym/gym.egg-info/._PKG-INFO
- supplement/code/gym/gym.egg-info/not-zip-safe
- __MACOSX/supplement/code/gym/gym.egg-info/._not-zip-safe
- supplement/code/gym/gym.egg-info/SOURCES.txt
- __MACOSX/supplement/code/gym/gym.egg-info/._SOURCES.txt
- supplement/code/gym/gym.egg-info/requires.txt
- __MACOSX/supplement/code/gym/gym.egg-info/._requires.txt
- supplement/code/gym/gym.egg-info/top_level.txt
- __MACOSX/supplement/code/gym/gym.egg-info/._top_level.txt
- supplement/code/gym/gym.egg-info/dependency_links.txt
- __MACOSX/supplement/code/gym/gym.egg-info/._dependency_links.txt
- supplement/code/gym/docs/environments.md
- __MACOSX/supplement/code/gym/docs/._environments.md
- supplement/code/gym/docs/wrappers.md
- __MACOSX/supplement/code/gym/docs/._wrappers.md
- supplement/code/gym/docs/readme.md
- __MACOSX/supplement/code/gym/docs/._readme.md
- supplement/code/gym/docs/creating-environments.md
- __MACOSX/supplement/code/gym/docs/._creating-environments.md
- supplement/code/gym/docs/misc.md
- __MACOSX/supplement/code/gym/docs/._misc.md
- supplement/code/gym/docs/agents.md
- __MACOSX/supplement/code/gym/docs/._agents.md
- supplement/code/gym/examples/agents/
- __MACOSX/supplement/code/gym/examples/._agents
- supplement/code/gym/examples/scripts/
- __MACOSX/supplement/code/gym/examples/._scripts
- supplement/code/gym/scripts/generate_json.py
- __MACOSX/supplement/code/gym/scripts/._generate_json.py
- supplement/code/gym/gym/wrappers/
- __MACOSX/supplement/code/gym/gym/._wrappers
- supplement/code/gym/gym/version.py
- __MACOSX/supplement/code/gym/gym/._version.py
- supplement/code/gym/gym/error.py
- __MACOSX/supplement/code/gym/gym/._error.py
- supplement/code/gym/gym/tests/
- __MACOSX/supplement/code/gym/gym/._tests
- supplement/code/gym/gym/spaces/
- __MACOSX/supplement/code/gym/gym/._spaces
[truncated: 2,888 more entries]
