# Supplementary material
Source: ML conference proceedings conference paper supplement (https://proceedings.mlr.press/v139/xie21c.html)
Supplement: Supplementary file 2 [file xie21c-supp.zip › supplement/code/gym/docs/agents.md]

# Agents

An "agent" describes the method of running an RL algorithm against an environment in the gym. The agent may contain the algorithm itself or simply provide an integration between an algorithm and the gym environments.

## RandomAgent

A sample agent located in this repo at `gym/examples/agents/random_agent.py`. This simple agent leverages the environments ability to produce a random valid action and does so for each step.  

## cem.py

A generic Cross-Entropy agent located in this repo at `gym/examples/agents/cem.py`. This agent defaults to 10 iterations of 25 episodes considering the top 20% "elite".

## dqn

This is a very basic DQN (with experience replay) implementation, which uses OpenAI's gym environment and Keras/Theano neural networks. [/sherjilozair/dqn](https://github.com/sherjilozair/dqn)

## Simple DQN

Simple, fast and easy to extend DQN implementation using [Neon](https://github.com/NervanaSystems/neon) deep learning library. Comes with out-of-box tools to train, test and visualize models. For details see [this blog post](https://www.nervanasys.com/deep-reinforcement-learning-with-neon/) or check out the [repo](https://github.com/tambetm/simple_dqn).

## AgentNet
A library that allows you to develop custom deep/convolutional/recurrent reinforcement learning agent with full integration with Theano/Lasagne. Also contains a toolkit for various reinforcement learning algorithms, policies, memory augmentations, etc.

 - The repo's here: [AgentNet](https://github.com/yandexdataschool/AgentNet)
 - [A step-by-step demo for Atari SpaceInvaders ](https://github.com/yandexdataschool/AgentNet/blob/master/examples/Playing%20Atari%20with%20Deep%20Reinforcement%20Learning%20%28OpenAI%20Gym%29.ipynb)

## rllab

a framework for developing and evaluating reinforcement learning algorithms, fully compatible with OpenAI Gym. It includes a wide range of continuous control tasks plus implementations of many algorithms. [/rllab/rllab](https://github.com/rllab/rllab)

## [keras-rl](https://github.com/matthiasplappert/keras-rl)

[keras-rl](https://github.com/matthiasplappert/keras-rl) implements some state-of-the art deep reinforcement learning algorithms. It was built with OpenAI Gym in mind, and also built on top of the deep learning library [Keras](https://keras.io/) and utilises similar design patterns like callbacks and user-definable metrics.
