# Supplementary material
Source: ML conference proceedings conference paper supplement (https://proceedings.mlr.press/v139/xie21c.html)
Supplement: Supplementary file 2 [file xie21c-supp.zip › supplement/code/gym/docs/misc.md]

# Miscellaneous

Here we have a bunch of tools, libs, apis, tutorials, resources, etc. provided by the community to add value to the gym ecosystem. 

## OpenAIGym.jl

Convenience wrapper of the OpenAI Gym for the Julia language [/tbreloff/OpenAIGym.jl](https://github.com/tbreloff/OpenAIGym.jl)
