# Supplementary material
Source: ML conference proceedings conference paper supplement (https://proceedings.mlr.press/v139/xie21c.html)
Supplement: Supplementary file 2 [file xie21c-supp.zip › supplement/code/gym/docs/readme.md]

# Table of Contents

 - [Environments](environments.md) lists Gym environments to run your algorithms against.

 - [Creating your own Environments](creating-environments.md) how to create your own Gym environments.
 
 - [Wrappers](wrappers.md) list of general purpose wrappers for environments. These can perform pre/postprocessing on the data that is exchanged between the agent and the environment.

 - [Agents](agents.md) contains a listing of agents compatible with Gym environments. Agents facilitate the running of an algorithm against an environment.

 - [Miscellaneous](misc.md) is a collection of other value-add tools and utilities. These could be anything from a small convenience lib to a collection of video tutorials or a new language binding. 
