# Supplementary material
Source: ML conference proceedings conference paper supplement (https://proceedings.mlr.press/v139/xie21c.html)
Supplement: Supplementary file 2 [file xie21c-supp.zip › supplement/code/gym/docs/wrappers.md]

# Wrappers

## Space Wrappers
Wrappers that transform observation and/or action space. Contains
 * Discretize (make a discrete version of a continuous space)
 * Flatten (put all actions/observations into a single dimension)
 * Rescale (rescale the range of values for continuous spaces).

Learn more here: https://github.com/ngc92/space-wrappers

## Utility wrappers for Atari Games
The baseline repository contains wrappers that are used when doing Atari 
experiments. 
These can be found here: https://github.com/openai/baselines/blob/master/baselines/common/atari_wrappers.py
