# Supplementary material
Source: ML conference proceedings conference paper supplement (https://proceedings.mlr.press/v139/xie21c.html)
Supplement: Supplementary file 2 [file xie21c-supp.zip › supplement/code/gym/examples/scripts/list_envs]

#!/usr/bin/env python
from gym import envs
envids = [spec.id for spec in envs.registry.all()]
for envid in sorted(envids):
    print(envid)
