# Supplementary material
Source: ML conference proceedings conference paper supplement (https://proceedings.mlr.press/v139/xie21c.html)
Supplement: Supplementary file 2 [file xie21c-supp.zip › supplement/code/gym/gym.egg-info/requires.txt]

scipy
numpy>=1.10.4
six
pyglet<=1.3.2,>=1.2.0
cloudpickle~=1.2.0

[:python_version < "3.4"]
enum34~=1.1.6

[all]
atari_py~=0.2.0
Pillow
opencv-python
box2d-py~=2.3.5
mujoco_py<2.1,>=1.50
imageio
mujoco_py<2.1,>=1.50
imageio

[atari]
atari_py~=0.2.0
Pillow
opencv-python

[box2d]
box2d-py~=2.3.5

[classic_control]

[mujoco]
mujoco_py<2.1,>=1.50
imageio

[robotics]
mujoco_py<2.1,>=1.50
imageio
