# Supplementary material
Source: ML conference proceedings conference paper supplement (https://proceedings.mlr.press/v139/xie21c.html)
Supplement: Supplementary file 2 [file xie21c-supp.zip › supplement/code/gym/gym.egg-info/SOURCES.txt]

README.rst
setup.py
gym/__init__.py
gym/core.py
gym/error.py
gym/logger.py
gym/version.py
gym.egg-info/PKG-INFO
gym.egg-info/SOURCES.txt
gym.egg-info/dependency_links.txt
gym.egg-info/not-zip-safe
gym.egg-info/requires.txt
gym.egg-info/top_level.txt
gym/envs/__init__.py
gym/envs/proxy_env.py
gym/envs/registration.py
gym/envs/algorithmic/__init__.py
gym/envs/algorithmic/algorithmic_env.py
gym/envs/algorithmic/copy_.py
gym/envs/algorithmic/duplicated_input.py
gym/envs/algorithmic/repeat_copy.py
gym/envs/algorithmic/reverse.py
gym/envs/algorithmic/reversed_addition.py
gym/envs/algorithmic/tests/__init__.py
gym/envs/algorithmic/tests/test_algorithmic.py
gym/envs/atari/__init__.py
gym/envs/atari/atari_env.py
gym/envs/box2d/__init__.py
gym/envs/box2d/bipedal_walker.py
gym/envs/box2d/car_dynamics.py
gym/envs/box2d/car_racing.py
gym/envs/box2d/lunar_lander.py
gym/envs/box2d/test_lunar_lander.py
gym/envs/classic_control/__init__.py
gym/envs/classic_control/acrobot.py
gym/envs/classic_control/cartpole.py
gym/envs/classic_control/continuous_mountain_car.py
gym/envs/classic_control/mountain_car.py
gym/envs/classic_control/pendulum.py
gym/envs/classic_control/rendering.py
gym/envs/classic_control/assets/clockwise.png
gym/envs/mujoco/__init__.py
gym/envs/mujoco/ant.py
gym/envs/mujoco/ant_v3.py
gym/envs/mujoco/half_cheetah.py
gym/envs/mujoco/half_cheetah_v3.py
gym/envs/mujoco/half_cheetah_vel_env.py
gym/envs/mujoco/half_cheetah_windvel_env.py
gym/envs/mujoco/hopper.py
gym/envs/mujoco/hopper_v3.py
gym/envs/mujoco/humanoid.py
gym/envs/mujoco/humanoid_v3.py
gym/envs/mujoco/humanoidstandup.py
gym/envs/mujoco/inverted_double_pendulum.py
gym/envs/mujoco/inverted_pendulum.py
gym/envs/mujoco/minitaur_goal_vel_env.py
gym/envs/mujoco/mujoco_env.py
gym/envs/mujoco/pusher.py
gym/envs/mujoco/reacher.py
gym/envs/mujoco/striker.py
gym/envs/mujoco/swimmer.py
gym/envs/mujoco/swimmer_v3.py
gym/envs/mujoco/thrower.py
gym/envs/mujoco/walker2d.py
gym/envs/mujoco/walker2d_v3.py
gym/envs/mujoco/assets/ant.xml
gym/envs/mujoco/assets/half_cheetah.xml
gym/envs/mujoco/assets/half_cheetah_wind.xml
gym/envs/mujoco/assets/hopper.xml
gym/envs/mujoco/assets/humanoid.xml
gym/envs/mujoco/assets/humanoidstandup.xml
gym/envs/mujoco/assets/inverted_double_pendulum.xml
gym/envs/mujoco/assets/inverted_pendulum.xml
gym/envs/mujoco/assets/point.xml
gym/envs/mujoco/assets/pusher.xml
gym/envs/mujoco/assets/reacher.xml
gym/envs/mujoco/assets/striker.xml
gym/envs/mujoco/assets/swimmer.xml
gym/envs/mujoco/assets/thrower.xml
gym/envs/mujoco/assets/walker2d.xml
gym/envs/robotics/__init__.py
gym/envs/robotics/fetch_env.py
gym/envs/robotics/hand_env.py
gym/envs/robotics/robot_env.py
gym/envs/robotics/rotations.py
gym/envs/robotics/utils.py
gym/envs/robotics/assets/LICENSE.md
gym/envs/robotics/assets/fetch/pick_and_place.xml
gym/envs/robotics/assets/fetch/push.xml
gym/envs/robotics/assets/fetch/reach.xml
gym/envs/robotics/assets/fetch/robot.xml
gym/envs/robotics/assets/fetch/shared.xml
gym/envs/robotics/assets/fetch/slide.xml
gym/envs/robotics/assets/hand/manipulate_block.xml
gym/envs/robotics/assets/hand/manipulate_block_touch_sensors.xml
gym/envs/robotics/assets/hand/manipulate_egg.xml
gym/envs/robotics/assets/hand/manipulate_egg_touch_sensors.xml
gym/envs/robotics/assets/hand/manipulate_pen.xml
gym/envs/robotics/assets/hand/manipulate_pen_touch_sensors.xml
gym/envs/robotics/assets/hand/reach.xml
gym/envs/robotics/assets/hand/robot.xml
gym/envs/robotics/assets/hand/robot_touch_sensors_92.xml
gym/envs/robotics/assets/hand/shared.xml
gym/envs/robotics/assets/hand/shared_asset.xml
gym/envs/robotics/assets/hand/shared_touch_sensors_92.xml
gym/envs/robotics/assets/stls/fetch/base_link_collision.stl
gym/envs/robotics/assets/stls/fetch/bellows_link_collision.stl
gym/envs/robotics/assets/stls/fetch/elbow_flex_link_collision.stl
gym/envs/robotics/assets/stls/fetch/estop_link.stl
gym/envs/robotics/assets/stls/fetch/forearm_roll_link_collision.stl
gym/envs/robotics/assets/stls/fetch/gripper_link.stl
gym/envs/robotics/assets/stls/fetch/head_pan_link_collision.stl
gym/envs/robotics/assets/stls/fetch/head_tilt_link_collision.stl
gym/envs/robotics/assets/stls/fetch/l_wheel_link_collision.stl
gym/envs/robotics/assets/stls/fetch/laser_link.stl
gym/envs/robotics/assets/stls/fetch/r_wheel_link_collision.stl
gym/envs/robotics/assets/stls/fetch/shoulder_lift_link_collision.stl
gym/envs/robotics/assets/stls/fetch/shoulder_pan_link_collision.stl
gym/envs/robotics/assets/stls/fetch/torso_fixed_link.stl
gym/envs/robotics/assets/stls/fetch/torso_lift_link_collision.stl
gym/envs/robotics/assets/stls/fetch/upperarm_roll_link_collision.stl
gym/envs/robotics/assets/stls/fetch/wrist_flex_link_collision.stl
gym/envs/robotics/assets/stls/fetch/wrist_roll_link_collision.stl
gym/envs/robotics/assets/stls/hand/F1.stl
gym/envs/robotics/assets/stls/hand/F2.stl
gym/envs/robotics/assets/stls/hand/F3.stl
gym/envs/robotics/assets/stls/hand/TH1_z.stl
gym/envs/robotics/assets/stls/hand/TH2_z.stl
gym/envs/robotics/assets/stls/hand/TH3_z.stl
gym/envs/robotics/assets/stls/hand/forearm_electric.stl
gym/envs/robotics/assets/stls/hand/forearm_electric_cvx.stl
gym/envs/robotics/assets/stls/hand/knuckle.stl
gym/envs/robotics/assets/stls/hand/lfmetacarpal.stl
gym/envs/robotics/assets/stls/hand/palm.stl
gym/envs/robotics/assets/stls/hand/wrist.stl
gym/envs/robotics/assets/textures/block.png
gym/envs/robotics/assets/textures/block_hidden.png
gym/envs/robotics/fetch/__init__.py
gym/envs/robotics/fetch/pick_and_place.py
gym/envs/robotics/fetch/push.py
gym/envs/robotics/fetch/reach.py
gym/envs/robotics/fetch/slide.py
gym/envs/robotics/hand/__init__.py
gym/envs/robotics/hand/manipulate.py
gym/envs/robotics/hand/manipulate_touch_sensors.py
gym/envs/robotics/hand/reach.py
gym/envs/tests/__init__.py
gym/envs/tests/spec_list.py
gym/envs/tests/test_determinism.py
gym/envs/tests/test_envs.py
gym/envs/tests/test_envs_semantics.py
gym/envs/tests/test_frozenlake_dfs.py
gym/envs/tests/test_kellycoinflip.py
gym/envs/tests/test_mujoco_v2_to_v3_conversion.py
gym/envs/tests/test_registration.py
gym/envs/toy_text/__init__.py
gym/envs/toy_text/blackjack.py
gym/envs/toy_text/cliffwalking.py
gym/envs/toy_text/discrete.py
gym/envs/toy_text/frozen_lake.py
gym/envs/toy_text/guessing_game.py
gym/envs/toy_text/hotter_colder.py
gym/envs/toy_text/kellycoinflip.py
gym/envs/toy_text/nchain.py
gym/envs/toy_text/roulette.py
gym/envs/toy_text/taxi.py
gym/envs/unittest/__init__.py
gym/envs/unittest/cube_crash.py
gym/envs/unittest/memorize_digits.py
gym/spaces/__init__.py
gym/spaces/box.py
gym/spaces/dict.py
gym/spaces/discrete.py
gym/spaces/multi_binary.py
gym/spaces/multi_discrete.py
gym/spaces/space.py
gym/spaces/tuple.py
gym/spaces/utils.py
gym/spaces/tests/__init__.py
gym/spaces/tests/test_spaces.py
gym/utils/__init__.py
gym/utils/atomic_write.py
gym/utils/closer.py
gym/utils/colorize.py
gym/utils/ezpickle.py
gym/utils/json_utils.py
gym/utils/play.py
gym/utils/seeding.py
gym/vector/__init__.py
gym/vector/async_vector_env.py
gym/vector/sync_vector_env.py
gym/vector/vector_env.py
gym/vector/tests/__init__.py
gym/vector/tests/test_async_vector_env.py
gym/vector/tests/test_numpy_utils.py
gym/vector/tests/test_shared_memory.py
gym/vector/tests/test_spaces.py
gym/vector/tests/test_sync_vector_env.py
gym/vector/tests/test_vector_env.py
gym/vector/tests/utils.py
gym/vector/utils/__init__.py
gym/vector/utils/misc.py
gym/vector/utils/numpy_utils.py
gym/vector/utils/shared_memory.py
gym/vector/utils/spaces.py
gym/wrappers/__init__.py
gym/wrappers/atari_preprocessing.py
gym/wrappers/clip_action.py
gym/wrappers/dict.py
gym/wrappers/filter_observation.py
gym/wrappers/flatten_observation.py
gym/wrappers/frame_stack.py
gym/wrappers/gray_scale_observation.py
gym/wrappers/monitor.py
gym/wrappers/pixel_observation.py
gym/wrappers/resize_observation.py
gym/wrappers/test_atari_preprocessing.py
gym/wrappers/test_clip_action.py
gym/wrappers/test_filter_observation.py
gym/wrappers/test_flatten_observation.py
gym/wrappers/test_frame_stack.py
gym/wrappers/test_gray_scale_observation.py
gym/wrappers/test_resize_observation.py
gym/wrappers/test_transform_reward.py
gym/wrappers/time_limit.py
gym/wrappers/transform_reward.py
gym/wrappers/monitoring/__init__.py
gym/wrappers/monitoring/stats_recorder.py
gym/wrappers/monitoring/video_recorder.py
gym/wrappers/monitoring/tests/__init__.py
gym/wrappers/monitoring/tests/helpers.py
gym/wrappers/monitoring/tests/test_video_recorder.py
gym/wrappers/tests/__init__.py
