# Supplementary material
Source: ML conference proceedings conference paper supplement (https://proceedings.mlr.press/v139/xie21c.html)
Supplement: Supplementary file 2 [file xie21c-supp.zip › supplement/code/gym/gym/__init__.py]

import distutils.version
import os
import sys
import warnings

from gym import error
from gym.version import VERSION as __version__

from gym.core import Env, GoalEnv, Wrapper, ObservationWrapper, ActionWrapper, RewardWrapper
from gym.spaces import Space
from gym.envs import make, spec, register
from gym import logger
from gym import vector

__all__ = ["Env", "Space", "Wrapper", "make", "spec", "register"]
