# Supplementary material
Source: ML conference proceedings conference paper supplement (https://proceedings.mlr.press/v139/xie21c.html)
Supplement: Supplementary file 2 [file xie21c-supp.zip › supplement/code/gym/gym/wrappers/__init__.py]

from gym import error
from gym.wrappers.monitor import Monitor
from gym.wrappers.time_limit import TimeLimit
from gym.wrappers.dict import FlattenDictWrapper
from gym.wrappers.filter_observation import FilterObservation
from gym.wrappers.atari_preprocessing import AtariPreprocessing
from gym.wrappers.flatten_observation import FlattenObservation
from gym.wrappers.gray_scale_observation import GrayScaleObservation
from gym.wrappers.frame_stack import LazyFrames
from gym.wrappers.frame_stack import FrameStack
from gym.wrappers.transform_reward import TransformReward
from gym.wrappers.resize_observation import ResizeObservation
from gym.wrappers.clip_action import ClipAction
