# Supplementary material
Source: ML conference proceedings conference paper supplement (https://proceedings.mlr.press/v139/xie21c.html)
Supplement: Supplementary file 2 [file xie21c-supp.zip › supplement/code/gym/gym/wrappers/atari_preprocessing.py]

import numpy as np

import gym
from gym.spaces import Box
from gym.wrappers import TimeLimit


class AtariPreprocessing(gym.Wrapper):
    r"""Atari 2600 preprocessings. 

    This class follows the guidelines in 
    Machado et al. (2018), "Revisiting the Arcade Learning Environment: 
    Evaluation Protocols and Open Problems for General Agents".

    Specifically:

    * NoopReset: obtain initial state by taking random number of no-ops on reset. 
    * FireReset: take action on reset for environments that are fixed until firing. 
    * Frame skipping: 4 by default
    * Max-pooling: most recent two observations
    * Termination signal when a life is lost: turned off by default. Not recommended by Machado et al. (2018).
    * Resize to a square image: 84x84 by default
    * Grayscale observation: optional

    Args:
        env (Env): environment
        noop_max (int): max number of no-ops
        frame_skip (int): the frequency at which the agent experiences the game. 
        screen_size (int): resize Atari frame
        terminal_on_life_loss (bool): if True, then step() returns done=True whenever a
            life is lost. 
        grayscale_obs (bool): if True, then gray scale observation is returned, otherwise, RGB observation
            is returned.

    """
    def __init__(self, env, noop_max=30, frame_skip=4, screen_size=84, terminal_on_life_loss=False, grayscale_obs=True):
        super().__init__(env)
        assert frame_skip > 0
        assert screen_size > 0

        self.noop_max = noop_max
        assert env.unwrapped.get_action_meanings()[0] == 'NOOP'

        self.frame_skip = frame_skip
        self.screen_size = screen_size
        self.terminal_on_life_loss = terminal_on_life_loss
        self.grayscale_obs = grayscale_obs

        # buffer of most recent two observations for max pooling
        if grayscale_obs:
            self.obs_buffer = [np.empty(env.observation_space.shape[:2], dtype=np.uint8),
                               np.empty(env.observation_space.shape[:2], dtype=np.uint8)]
        else:
            self.obs_buffer = [np.empty(env.observation_space.shape, dtype=np.uint8),
                               np.empty(env.observation_space.shape, dtype=np.uint8)]

        self.ale = env.unwrapped.ale
        self.lives = 0
        self.game_over = False

        if grayscale_obs:
            self.observation_space = Box(low=0, high=255, shape=(screen_size, screen_size), dtype=np.uint8)
        else:
            self.observation_space = Box(low=0, high=255, shape=(screen_size, screen_size, 3), dtype=np.uint8)

    def step(self, action):
        R = 0.0

        for t in range(self.frame_skip):
            _, reward, done, info = self.env.step(action)
            R += reward
            self.game_over = done

            if self.terminal_on_life_loss:
                new_lives = self.ale.lives()
                done = done or new_lives < self.lives
                self.lives = new_lives

            if done:
                break    
            if t == self.frame_skip - 2:
                if self.grayscale_obs:
                    self.ale.getScreenGrayscale(self.obs_buffer[0])
                else:
                    self.ale.getScreenRGB2(self.obs_buffer[0])
            elif t == self.frame_skip - 1:
                if self.grayscale_obs:
                    self.ale.getScreenGrayscale(self.obs_buffer[1])    
                else:
                    self.ale.getScreenRGB2(self.obs_buffer[1])    
        return self._get_obs(), R, done, info

    def reset(self, **kwargs):
        # NoopReset
        self.env.reset(**kwargs)
        noops = self.env.unwrapped.np_random.randint(1, self.noop_max + 1) if self.noop_max > 0 else 0
        for _ in range(noops):
            _, _, done, _ = self.env.step(0)
            if done:
                self.env.reset(**kwargs)

        # FireReset
        action_meanings = self.env.unwrapped.get_action_meanings()
        if action_meanings[1] == 'FIRE' and len(action_meanings) >= 3:
            self.env.step(1)
            self.env.step(2)

        self.lives = self.ale.lives()
        if self.grayscale_obs:
            self.ale.getScreenGrayscale(self.obs_buffer[0])
        else:
            self.ale.getScreenRGB2(self.obs_buffer[0])
        self.obs_buffer[1].fill(0)
        return self._get_obs()

    def _get_obs(self):
        import cv2
        if self.frame_skip > 1:  # more efficient in-place pooling
            np.maximum(self.obs_buffer[0], self.obs_buffer[1], out=self.obs_buffer[0])
        obs = cv2.resize(self.obs_buffer[0], (self.screen_size, self.screen_size), interpolation=cv2.INTER_AREA)
        obs = np.asarray(obs, dtype=np.uint8)
        return obs
