# Supplementary material
Source: ML conference proceedings conference paper supplement (https://proceedings.mlr.press/v139/xie21c.html)
Supplement: Supplementary file 2 [file xie21c-supp.zip › supplement/code/gym/gym/wrappers/clip_action.py]

import numpy as np

from gym import ActionWrapper
from gym.spaces import Box


class ClipAction(ActionWrapper):
    r"""Clip the continuous action within the valid bound. """
    def __init__(self, env):
        assert isinstance(env.action_space, Box)
        super(ClipAction, self).__init__(env)

    def action(self, action):
        return np.clip(action, self.action_space.low, self.action_space.high)
