# Supplementary material
Source: ML conference proceedings conference paper supplement (https://proceedings.mlr.press/v139/xie21c.html)
Supplement: Supplementary file 2 [file xie21c-supp.zip › supplement/code/gym/gym/wrappers/flatten_observation.py]

import numpy as np
import gym.spaces as spaces
from gym import ObservationWrapper


class FlattenObservation(ObservationWrapper):
    r"""Observation wrapper that flattens the observation."""
    def __init__(self, env):
        super(FlattenObservation, self).__init__(env)

        flatdim = spaces.flatdim(env.observation_space)
        self.observation_space = spaces.Box(low=-float('inf'), high=float('inf'), shape=(flatdim,), dtype=np.float32)

    def observation(self, observation):
        return spaces.flatten(self.observation_space, observation)
