# Supplementary material
Source: ML conference proceedings conference paper supplement (https://proceedings.mlr.press/v139/xie21c.html)
Supplement: Supplementary file 2 [file xie21c-supp.zip › supplement/code/gym/gym/wrappers/gray_scale_observation.py]

import numpy as np

from gym.spaces import Box
from gym import ObservationWrapper


class GrayScaleObservation(ObservationWrapper):
    r"""Convert the image observation from RGB to gray scale. """
    def __init__(self, env, keep_dim=False):
        super(GrayScaleObservation, self).__init__(env)
        self.keep_dim = keep_dim

        assert len(env.observation_space.shape) == 3 and env.observation_space.shape[-1] == 3
        obs_shape = self.observation_space.shape[:2]
        if self.keep_dim:
            self.observation_space = Box(low=0, high=255, shape=(obs_shape[0], obs_shape[1], 1), dtype=np.uint8)
        else:
            self.observation_space = Box(low=0, high=255, shape=obs_shape, dtype=np.uint8)

    def observation(self, observation):
        import cv2
        observation = cv2.cvtColor(observation, cv2.COLOR_RGB2GRAY)
        if self.keep_dim:
            observation = np.expand_dims(observation, -1)
        return observation
