# Supplementary material
Source: ML conference proceedings conference paper supplement (https://proceedings.mlr.press/v139/xie21c.html)
Supplement: Supplementary file 2 [file xie21c-supp.zip › supplement/code/gym/gym/wrappers/pixel_observation.py]

"""An observation wrapper that augments observations by pixel values."""

import collections
import copy

import numpy as np

from gym import spaces
from gym import ObservationWrapper

STATE_KEY = 'state'


class PixelObservationWrapper(ObservationWrapper):
    """Augment observations by pixel values."""

    def __init__(self,
                 env,
                 pixels_only=True,
                 render_kwargs=None,
                 pixel_keys=('pixels', )):
        """Initializes a new pixel Wrapper.

        Args:
            env: The environment to wrap.
            pixels_only: If `True` (default), the original observation returned
                by the wrapped environment will be discarded, and a dictionary
                observation will only include pixels. If `False`, the
                observation dictionary will contain both the original
                observations and the pixel observations.
            render_kwargs: Optional `dict` containing keyword arguments passed
                to the `self.render` method.
            pixel_keys: Optional custom string specifying the pixel
                observation's key in the `OrderedDict` of observations.
                Defaults to 'pixels'.

        Raises:
            ValueError: If `env`'s observation spec is not compatible with the
                wrapper. Supported formats are a single array, or a dict of
                arrays.
            ValueError: If `env`'s observation already contains any of the
                specified `pixel_keys`.
        """

        super(PixelObservationWrapper, self).__init__(env)

        if render_kwargs is None:
            render_kwargs = {}

        for key in pixel_keys:
            render_kwargs.setdefault(key, {})

            render_mode = render_kwargs[key].pop('mode', 'rgb_array')
            assert render_mode == 'rgb_array', render_mode
            render_kwargs[key]['mode'] = 'rgb_array'

        wrapped_observation_space = env.observation_space

        if isinstance(wrapped_observation_space, spaces.Box):
            self._observation_is_dict = False
            invalid_keys = set([STATE_KEY])
        elif isinstance(wrapped_observation_space,
                        (spaces.Dict, collections.MutableMapping)):
            self._observation_is_dict = True
            invalid_keys = set(wrapped_observation_space.spaces.keys())
        else:
            raise ValueError("Unsupported observation space structure.")

        if not pixels_only:
            # Make sure that now keys in the `pixel_keys` overlap with
            # `observation_keys`
            overlapping_keys = set(pixel_keys) & set(invalid_keys)
            if overlapping_keys:
                raise ValueError("Duplicate or reserved pixel keys {!r}."
                                 .format(overlapping_keys))

        if pixels_only:
            self.observation_space = spaces.Dict()
        elif self._observation_is_dict:
            self.observation_space = copy.deepcopy(wrapped_observation_space)
        else:
            self.observation_space = spaces.Dict()
            self.observation_space.spaces[STATE_KEY] = wrapped_observation_space

        # Extend observation space with pixels.

        pixels_spaces = {}
        for pixel_key in pixel_keys:
            pixels = self.env.render(**render_kwargs)

            if np.issubdtype(pixels.dtype, np.integer):
                low, high = (0, 255)
            elif np.issubdtype(pixels.dtype, np.float):
                low, high = (-float('inf'), float('inf'))
            else:
                raise TypeError(pixels.dtype)

            pixels_space = spaces.Box(
                shape=pixels.shape, low=low, high=high, dtype=pixels.dtype)
            pixels_spaces[pixel_key] = pixels_space

        self.observation_space.spaces.update(pixels_spaces)

        self._env = env
        self._pixels_only = pixels_only
        self._render_kwargs = render_kwargs
        self._pixel_keys = pixel_keys

    def observation(self, observation):
        pixel_observation = self._add_pixel_observation(observation)
        return pixel_observation

    def _add_pixel_observation(self, observation):
        if self._pixels_only:
            observation = collections.OrderedDict()
        elif self._observation_is_dict:
            observation = type(observation)(observation)
        else:
            observation = collections.OrderedDict()
            observation[STATE_KEY] = observation

        pixel_observations = {
            pixel_key: self.env.render(**self._render_kwargs[pixel_key])
            for pixel_key in self._pixel_keys
        }

        observation.update(pixel_observations)

        return observation
