# Supplementary material
Source: ML conference proceedings conference paper supplement (https://proceedings.mlr.press/v139/xie21c.html)
Supplement: Supplementary file 2 [file xie21c-supp.zip › supplement/code/gym/gym/wrappers/test_atari_preprocessing.py]

import numpy as np
import gym
from gym.wrappers import AtariPreprocessing
import pytest
pytest.importorskip('atari_py')

def test_atari_preprocessing():
    import cv2
    env_fn = lambda: gym.make('PongNoFrameskip-v4')
    env1 = env_fn()
    env2 = AtariPreprocessing(env_fn(), screen_size=84, grayscale_obs=True, frame_skip=1, noop_max=0)
    env3 = AtariPreprocessing(env_fn(), screen_size=84, grayscale_obs=False, frame_skip=1, noop_max=0)
    env1.reset()
    # take these steps to imitate actions of FireReset logic
    env1.step(1)
    obs1 = env1.step(2)[0]
    obs2 = env2.reset()
    obs3 = env3.reset()
    assert obs1.shape == (210, 160, 3)
    assert obs2.shape == (84, 84)
    assert obs3.shape == (84, 84, 3)
    np.testing.assert_allclose(obs3, cv2.resize(obs1, (84, 84), interpolation=cv2.INTER_AREA))
    obs3_gray = cv2.cvtColor(obs3, cv2.COLOR_RGB2GRAY)
    # the edges of the numbers do not render quite the same in the grayscale, so we ignore them
    np.testing.assert_allclose(obs2[10:], obs3_gray[10:])
