# Supplementary material
Source: ML conference proceedings conference paper supplement (https://proceedings.mlr.press/v139/xie21c.html)
Supplement: Supplementary file 2 [file xie21c-supp.zip › supplement/code/gym/gym/wrappers/test_clip_action.py]

import numpy as np

import gym
from gym.wrappers import ClipAction


def test_clip_action():
    # mountaincar: action-based rewards
    make_env = lambda: gym.make('MountainCarContinuous-v0')
    env = make_env()
    wrapped_env = ClipAction(make_env())

    seed = 0
    env.seed(seed)
    wrapped_env.seed(seed)

    env.reset()
    wrapped_env.reset()

    actions = [[.4], [1.2], [-0.3], [0.0], [-2.5]]
    for action in actions:
        obs1, r1, d1, _ = env.step(np.clip(action, env.action_space.low, env.action_space.high))
        obs2, r2, d2, _ = wrapped_env.step(action)
        assert np.allclose(r1, r2)
        assert np.allclose(obs1, obs2)
        assert d1 == d2
