# Supplementary material
Source: ML conference proceedings conference paper supplement (https://proceedings.mlr.press/v139/xie21c.html)
Supplement: Supplementary file 2 [file xie21c-supp.zip › supplement/code/gym/gym/wrappers/time_limit.py]

import gym


class TimeLimit(gym.Wrapper):
    def __init__(self, env, max_episode_steps=None):
        super(TimeLimit, self).__init__(env)
        if max_episode_steps is None and self.env.spec is not None:
            max_episode_steps = env.spec.max_episode_steps
        if self.env.spec is not None:
            self.env.spec.max_episode_steps = max_episode_steps
        self._max_episode_steps = max_episode_steps
        self._elapsed_steps = None

    def step(self, action):
        assert self._elapsed_steps is not None, "Cannot call env.step() before calling reset()"
        observation, reward, done, info = self.env.step(action)
        self._elapsed_steps += 1
        if self._elapsed_steps >= self._max_episode_steps:
            info['TimeLimit.truncated'] = not done
            done = True
        return observation, reward, done, info

    def reset(self, **kwargs):
        self._elapsed_steps = 0
        return self.env.reset(**kwargs)
