# Supplementary material
Source: ML conference proceedings conference paper supplement (https://proceedings.mlr.press/v139/xie21c.html)
Supplement: Supplementary file 2 [file xie21c-supp.zip › supplement/code/gym/gym/wrappers/transform_reward.py]

from gym import RewardWrapper


class TransformReward(RewardWrapper):
    r"""Transform the reward via an arbitrary function.

    Example::

        >>> import gym
        >>> env = gym.make('CartPole-v1')
        >>> env = TransformReward(env, lambda r: 0.01*r)
        >>> env.reset()
        >>> observation, reward, done, info = env.step(env.action_space.sample())
        >>> reward
        0.01

    Args:
        env (Env): environment
        f (callable): a function that transforms the reward

    """
    def __init__(self, env, f):
        super(TransformReward, self).__init__(env)
        assert callable(f)
        self.f = f

    def reward(self, reward):
        return self.f(reward)
