# Supplementary material
Source: ML conference proceedings conference paper supplement (https://proceedings.mlr.press/v139/xie21c.html)
Supplement: Supplementary file 2 [file xie21c-supp.zip › supplement/code/gym/scripts/generate_json.py]

from __future__ import unicode_literals
from gym import envs, spaces, logger
import json
import os
import sys
import argparse

from gym.envs.tests.spec_list import should_skip_env_spec_for_tests
from gym.envs.tests.test_envs_semantics import generate_rollout_hash, hash_object

DATA_DIR = os.path.join(os.path.dirname(__file__), os.pardir, 'gym', 'envs', 'tests')
ROLLOUT_STEPS = 100
episodes = ROLLOUT_STEPS
steps = ROLLOUT_STEPS

ROLLOUT_FILE = os.path.join(DATA_DIR, 'rollout.json')

if not os.path.isfile(ROLLOUT_FILE):
    logger.info("No rollout file found. Writing empty json file to {}".format(ROLLOUT_FILE))
    with open(ROLLOUT_FILE, "w") as outfile:
        json.dump({}, outfile, indent=2)

def update_rollout_dict(spec, rollout_dict):
    """
    Takes as input the environment spec for which the rollout is to be generated,
    and the existing dictionary of rollouts. Returns True iff the dictionary was
    modified.
    """
    # Skip platform-dependent
    if should_skip_env_spec_for_tests(spec):
        logger.info("Skipping tests for {}".format(spec.id))
        return False

    # Skip environments that are nondeterministic
    if spec.nondeterministic:
        logger.info("Skipping tests for nondeterministic env {}".format(spec.id))
        return False

    logger.info("Generating rollout for {}".format(spec.id))

    try:
        observations_hash, actions_hash, rewards_hash, dones_hash = generate_rollout_hash(spec)
    except:
        # If running the env generates an exception, don't write to the rollout file
        logger.warn("Exception {} thrown while generating rollout for {}. Rollout not added.".format(sys.exc_info()[0], spec.id))
        return False

    rollout = {}
    rollout['observations'] = observations_hash
    rollout['actions'] = actions_hash
    rollout['rewards'] = rewards_hash
    rollout['dones'] = dones_hash

    existing = rollout_dict.get(spec.id)
    if existing:
        differs = False
        for key, new_hash in rollout.items():
            differs = differs or existing[key] != new_hash
        if not differs:
            logger.debug("Hashes match with existing for {}".format(spec.id))
            return False
        else:
            logger.warn("Got new hash for {}. Overwriting.".format(spec.id))

    rollout_dict[spec.id] = rollout
    return True

def add_new_rollouts(spec_ids, overwrite):
    environments = [spec for spec in envs.registry.all() if spec.entry_point is not None]
    if spec_ids:
        environments = [spec for spec in environments if spec.id in spec_ids]
        assert len(environments) == len(spec_ids), "Some specs not found"
    with open(ROLLOUT_FILE) as data_file:
        rollout_dict = json.load(data_file)
    modified = False
    for spec in environments:
        if not overwrite and spec.id in rollout_dict:
            logger.debug("Rollout already exists for {}. Skipping.".format(spec.id))
        else:
            modified = update_rollout_dict(spec, rollout_dict) or modified

    if modified:
        logger.info("Writing new rollout file to {}".format(ROLLOUT_FILE))
        with open(ROLLOUT_FILE, "w") as outfile:
            json.dump(rollout_dict, outfile, indent=2, sort_keys=True)
    else:
        logger.info("No modifications needed.")

if __name__ == '__main__':
    parser = argparse.ArgumentParser()
    parser.add_argument('-f', '--force', action='store_true', help='Overwrite '+
        'existing rollouts if hashes differ.')
    parser.add_argument('-v', '--verbose', action='store_true')
    parser.add_argument('specs', nargs='*', help='ids of env specs to check (default: all)')
    args = parser.parse_args()
    if args.verbose:
        logger.set_level(logger.INFO)
    add_new_rollouts(args.specs, args.force)
