# Supplementary material
Source: ML conference proceedings conference paper supplement (https://proceedings.mlr.press/v139/xie21c.html)
Supplement: Supplementary file 2 [file xie21c-supp.zip › supplement/code/metaworld/CONTRIBUTING.md]

# Contributing to Meta-World
Use this guide to prepare your contribution.

## What we are looking for in new tasks
We particularly welcome contributions of additional tasks that thematically fit within the MT50 and ML45 benchmarks. Such tasks should conform to the action space, observation space, assets, and reward function form as the other tasks. Further, you must run SAC and PPO on the task and include a learning curve.

### Checklist for adding new tasks

Ensure that your task and pull request:
* [ ] Can be performed by a real robot arm 
* [ ] Is dissimilar from current tasks
* [ ] Contains meaningful internal variation (e.g. different object positions, etc.)
* [ ] Conforms to the action space, observation space, and reward functions conventions used by metaworld environments
* [ ] Uses existing assets if they exist, and that any new assets added are high-quality
* [ ] Follows the code qualtiy, style, testing, and documentation guidelines outlined below
* [ ] Provides learning curves which show the task can by solved by PPO and SAC, using the implementations linked below

PPO: https://github.com/rlworkgroup/garage/blob/master/src/garage/tf/algos/ppo.py

SAC: https://github.com/rail-berkeley/softlearning

## Pull requests
All contributions to the Meta-World codebase are submitted via a GitHub pull request.

### Review process
To be submitted, a pull request must satisfy the following criteria:
1. Rebases cleanly on the `master` branch
1. Passes all continuous integration tests
1. Conforms to the git commit message [format](#commit-message-format)
1. Receives approval from another contributor
1. Receives approval from a maintainer (distinct from the contributor review)

These criteria may be satisfied in any order, but in practice your PR is unlikely to get attention from contributors until 1-3 are satisfied. Maintainer attention is a scarce resource, so generally maintainers wait for a review from a non-maintainer contributor before reviewing your PR.

## Preparing your repo to make contributions
After following the standard Meta-World setup steps, make sure to run to install the pre-commit hooks into your repository. pre-commit helps streamline the pull request process by catching basic problems locally before they are checked by the CI.

To setup pre-commit in your repo:
```sh
# make sure your Python environment is activated, e.g.
# conda activate Meta-World
# pipenv shell
# poetry shell
# source venv/bin/activate
pre-commit install -t pre-commit
pre-commit install -t pre-push
pre-commit install -t commit-msg
```

Once you've installed pre-commit, it will automatically run every time you type `git commit`.

## Code style
The Python code in metaworld conforms to the [PEP8](https://www.python.org/dev/peps/pep-0008/) standard. Please read and understand it in detail.

### Meta-World specific Python style
These are Meta-World specific rules which are not part of the aforementioned style guides.
* Python package imports should be sorted alphabetically within their PEP8 groupings.

    The sorting is alphabetical from left to right, ignoring case and Python keywords (i.e. `import`, `from`, `as`). Notable exceptions apply in `__init__.py` files, where sometimes this rule will trigger a circular import.

* Prefer single-quoted strings (`'foo'`) over double-quoted strings (`"foo"`).

    Double-quoted strings can be used if there is a compelling escape or formatting reason for using single quotes (e.g. a single quote appears inside the string).

* Add convenience imports in `__init__.py` of a package for shallow first-level repetitive imports, but not for subpackages, even if that subpackage is defined in a single `.py` file.

    For instance, if an import line reads `from 
    .foo.bar import Bar` then you should add `from metaworld.foo.bar import Bar` to `metaworld/foo/__init__.py` so that users may instead write `from metaworld.foo import Bar`. However, if an import line reads `from metaworld.foo.bar.stuff import Baz`, *do not* add `from metaworld.foo.bar.stuff import Baz` to `metaworld/foo/__init__.py`, because that obscures the `stuff` subpackage.

    *Do*

    `metaworld/foo/__init__.py`:
    ```python
    """Foo package."""
    from metaworld.foo.bar import Bar
    ```
    `metaworld/barp/bux.py`:
    ```python
    """Bux tools for barps."""
    from metaworld.foo import Bar
    from metaworld.foo.stuff import Baz
    ```

    *Don't*

    `metaworld/foo/__init__.py`:
    ```python
    """Foo package."""
    from metaworld.foo.bar import Bar
    from metaworld.foo.bar.stuff import Baz
    ```
    `metaworld/barp/bux.py`:
    ```python
    """Bux tools for barps."""
    from metaworld.foo import Bar
    from metaworld.foo import Baz
    ```
* Imports within the same package should be absolute, to avoid creating circular dependencies due to convenience imports in `__init__.py`

    *Do*

    `metaworld/foo/bar.py`
    ```python
    from metaworld.foo.baz import Baz

    b = Baz()
    ```

    *Don't*

    `metaworld/foo/bar.py`
    ```python
    from metaworld.foo import Baz  # this could lead to a circular import, if Baz is imported in metaworld/foo/__init__.py

    b = Baz()
    ```

* Base and interface classes (i.e. classes which are not intended to ever be instantiated) should use the `abc` package to declare themselves as abstract.

   i.e. your class should inherit from `abc.ABC` or use the metaclass `abc.ABCMeta`, it should declare its methods abstract (e.g. using `@abc.abstractmethod`) as-appropriate. Abstract methods should all use `pass` as their implementation, not `raise NotImplementedError`

   *Do*
   ```python
   import abc

   class Robot(abc.ABC):
       """Interface for robots."""

       @abc.abstractmethod
       def beep(self):
           pass
    ```

    *Don't*
    ```python

    class Robot(object):
        "Base class for robots."""

        def beep(self):
            raise NotImplementedError
    ```

* When using external dependencies, use the `import` statement only to import whole modules, not individual classes or functions.

    This applies to both packages from the standard library and 3rd-party dependencies. If a package has a long or cumbersome full path, or is used very frequently (e.g. `numpy`, `tensorflow`), you may use the keyword `as` to create a file-specific name which makes sense. Additionally, you should always follow the community concensus short names for common dependencies (see below).

    *Do*
    ```python
    import collections

    import gym.spaces

    from garage.tf.models import MLPModel

    q = collections.deque(10)
    d = gym.spaces.Discrete(5)
    m = MLPModel(output_dim=2)
    ```

    *Don't*
    ```python
    from collections import deque

    from gym.spaces import Discrete
    import tensorflow as tf

    from garage.tf.models import MLPModel

    q = deque(10)
    d = Discrete(5)
    m = MLPModel(output_dim=2)
    ```

    *Known community-concensus imports*
    ```python
    import numpy as np
    import matplotlib.pyplot as plt
    import tensorflow as tf
    import tensorflow_probability as tfp
    import torch.nn as nn
    import torch.nn.functional as F
    import torch.optim as optim
    import dowel.logger as logger
    import dowel.tabular as tabular
    ```

## Documentation
Python files should provide docstrings for all public methods which follow [PEP257](https://www.python.org/dev/peps/pep-0257/) docstring conventions and [Google](http://google.github.io/styleguide/pyguide.html#38-comments-and-docstrings) docstring formatting. A good docstring example can be found [here](https://sphinxcontrib-napoleon.readthedocs.io/en/latest/example_google.html).

Additional standards:
* Docstrings for `__init__` should be included in the class docstring as suggested in the [Google example](https://sphinxcontrib-napoleon.readthedocs.io/en/latest/example_google.html).
* Docstrings should provide full type information for all arguments, return values, exceptions, etc. according to the Google format

### Application guide
**Newly created** Python files should follow all of the above standards for docstrings.

**Non-trivially modified** Python files should be submitted with updated docstrings according to the above standard.

**New or heavily-redesigned** modules with non-trivial APIs and functionality should provide full text documentation, in addition to docstrings, which covers:
* Explanation of the purpose of the module or API
* Brief overview of its design
* Usage examples for the most common use cases
* Explicitly calls out common gotchas, misunderstandings, etc.
* A quick summary of how to go about advanced usage, configuration, or extension

### Other languages
Non-Python files (including XML, HTML, CSS, JS, and Shell Scripts) should follow the [Google Style Guide](https://github.com/google/styleguide) for that language

YAML files should use 2 spaces for indentation.

### Whitespace (all languages)
* Use Unix-style line endings
* Trim trailing whitespace from all lines
* All files should end in a single newline

## Testing
metaworld maintains a test suite to ensure that future changes do not break existing functionality. We use TravisCI to run a unit test suite on every pull request before merging.

* New functionality should always include unit tests and, where appropriate, integration tests.
* PRs fixing bugs which were not caught by an existing test should always include a test replicating the bug

### Creating Tests
Add a test for your functionality under the `metaworld/tests/` directory. Make sure your test filename is prepended with test(i.e. `test_<filename>.py`) to ensure the test will be run in the CI.

## Git

### Workflow
__metaworld uses a linear commit history and rebase-only merging.__

This means that no merge commits appear in the project history. All pull requests, regardless of number of commits, are squashed to a single atomic commit at merge time.

Do's and Don'ts for avoiding accidental merge commits and other headaches:
* *Don't* use GitHub's "Update branch" button on pull requests, no matter how tempting it seems
* *Don't* use `git merge`
* *Don't* use `git pull` (unless git tells you that your branch can be fast-forwarded)
* *Don't* make commits in the `master` branch---always use a feature branch
* *Do* fetch upstream (`rlworkgroup/metaworld`) frequently and keep your `master` branch up-to-date with upstream
* *Do* rebase your feature branch on `master` frequently
* *Do* keep only one or a few commits in your feature branch, and use `git commit --amend` to update your changes. This helps prevent long chains of identical merges during a rebase.

Please see [this guide](https://gist.github.com/markreid/12e7c2203916b93d23c27a263f6091a0) for a tutorial on the workflow. Note: unlike the guide, we don't use separate `develop`/`master` branches, so all PRs should be based on `master` rather than `develop`

### Commit message format
metaworld follows the git commit message guidelines documented [here](https://gist.github.com/robertpainsi/b632364184e70900af4ab688decf6f53) and [here](https://chris.beams.io/posts/git-commit/). You can also find an in-depth guide to writing great commit messages [here](https://github.com/RomuloOliveira/commit-messages-guide/blob/master/README.md)

In short:
* All commit messages have an informative subject line of 50 characters
* A newline between the subject and the body
* If relevant, an informative body which is wrapped to 72 characters

### Git recipes

These recipes assume you are working out of a private GitHub fork.

If you are working directly as a contributor to `rlworkgroup`, you can replace references to `rlworkgroup` with `origin`. You also, of course, do not need to add `rlworkgroup` as a remote, since it will be `origin` in your repository.

#### Clone your GitHub fork and setup the rlworkgroup remote
```sh
git clone git@github.com:<your_github_username>/metaworld.git
cd metaworld
git remote add rlworkgroup git@github.com:rlworkgroup/metaworld.git
git fetch rlworkgroup
```

#### Update your GitHub fork with the latest from upstream
```sh
git fetch rlworkgroup
git reset --hard master rlworkgroup/master
git push -f origin master
```

#### Make a new feature branch and push it to your fork
```sh
git checkout master
git checkout -b myfeaturebranch
# make some changes
git add file1 file2 file3
git commit # Write a commit message conforming to the guidelines
git push origin myfeaturebranch
```

#### Rebase a feature branch so it's up-to-date with upstream and push it to your fork
```sh
git checkout master
git fetch rlworkgroup
git reset --hard rlworkgroup/master
git checkout myfeaturebranch
git rebase master
# you may need to manually reconcile merge conflicts here. Follow git's instructions.
git push -f origin myfeaturebranch # -f is frequently necessary because rebases rewrite history
```

## Release

### Modify CHANGELOG.md
For each release in metaworld, modify [CHANGELOG.md](https://github.com/rlworkgroup/metaworld/blob/master/CHANGELOG.md) with the most relevant changes from the latest release. The format is based on [Keep a Changelog](https://keepachangelog.com/en/1.0.0/), which adheres to [Semantic Versioning](https://semver.org/spec/v2.0.0.html).
