# Supplementary material
Source: ML conference proceedings conference paper supplement (https://proceedings.mlr.press/v139/xie21c.html)
Supplement: Supplementary file 2 [file xie21c-supp.zip › supplement/code/metaworld/docker/Dockerfile]

ARG PARENT_IMAGE=rlworkgroup/garage-headless
FROM $PARENT_IMAGE

# Copy setup.py first, so that the Docker cache doesn't expire until
# dependencies change
COPY setup.py /root/code/metaworld/setup.py
WORKDIR /root/code/metaworld

# Install metaworld dependencies
RUN pip install -e .[dev]

# Add code stub last
COPY . /root/code/metaworld
