# Supplementary material
Source: ML conference proceedings conference paper supplement (https://proceedings.mlr.press/v139/xie21c.html)
Supplement: Supplementary file 2 [file xie21c-supp.zip › supplement/code/metaworld/MANIFEST.in]

graft metaworld/envs/assets 
