# Supplementary material
Source: ML conference proceedings conference paper supplement (https://proceedings.mlr.press/v139/xie21c.html)
Supplement: Supplementary file 2 [file xie21c-supp.zip › supplement/code/metaworld/metaworld.egg-info/PKG-INFO]

Metadata-Version: 2.1
Name: metaworld
Version: 0.0.0
Summary: UNKNOWN
Home-page: UNKNOWN
License: UNKNOWN
Description: UNKNOWN
Platform: UNKNOWN
Provides-Extra: dev
