# Supplementary material
Source: ML conference proceedings conference paper supplement (https://proceedings.mlr.press/v139/xie21c.html)
Supplement: Supplementary file 2 [file xie21c-supp.zip › supplement/code/metaworld/metaworld.egg-info/requires.txt]

mujoco-py<2.1,>=2.0
opencv-python>=4.1.0.25

[dev]
ipdb
memory_profiler
pylint
pyquaternion==0.9.5
pytest>=3.6
