# Supplementary material
Source: ML conference proceedings conference paper supplement (https://proceedings.mlr.press/v139/xie21c.html)
Supplement: Supplementary file 2 [file xie21c-supp.zip › supplement/code/metaworld/metaworld.egg-info/SOURCES.txt]

MANIFEST.in
setup.py
metaworld/__init__.py
metaworld.egg-info/PKG-INFO
metaworld.egg-info/SOURCES.txt
metaworld.egg-info/dependency_links.txt
metaworld.egg-info/requires.txt
metaworld.egg-info/top_level.txt
metaworld/benchmarks/__init__.py
metaworld/benchmarks/base.py
metaworld/benchmarks/ml1.py
metaworld/benchmarks/ml10.py
metaworld/benchmarks/ml45.py
metaworld/benchmarks/mt10.py
metaworld/benchmarks/mt50.py
metaworld/core/__init__.py
metaworld/core/flat_goal_env.py
metaworld/core/gym_to_multi_env.py
metaworld/core/image_env.py
metaworld/core/multitask_env.py
metaworld/core/serializable.py
metaworld/core/wrapper_env.py
metaworld/envs/__init__.py
metaworld/envs/env_util.py
metaworld/envs/assets/classic_mujoco/half_cheetah.xml
metaworld/envs/assets/meshes/.DS_Store
metaworld/envs/assets/meshes/objects/mug.stl
metaworld/envs/assets/meshes/sawyer/.DS_Store
metaworld/envs/assets/meshes/sawyer/GUIDE_WSG50_110.stl
metaworld/envs/assets/meshes/sawyer/WSG-FMF.stl
metaworld/envs/assets/meshes/sawyer/WSG50_110.stl
metaworld/envs/assets/meshes/sawyer/base.stl
metaworld/envs/assets/meshes/sawyer/eGripperBase.stl
metaworld/envs/assets/meshes/sawyer/head.stl
metaworld/envs/assets/meshes/sawyer/l0.stl
metaworld/envs/assets/meshes/sawyer/l1.stl
metaworld/envs/assets/meshes/sawyer/l2.stl
metaworld/envs/assets/meshes/sawyer/l3.stl
metaworld/envs/assets/meshes/sawyer/l4.stl
metaworld/envs/assets/meshes/sawyer/l5.stl
metaworld/envs/assets/meshes/sawyer/l6.stl
metaworld/envs/assets/meshes/sawyer/pedestal.stl
metaworld/envs/assets/meshes/sawyer/sawyer_ft/PEDESTAL.DAE
metaworld/envs/assets/meshes/sawyer/sawyer_ft/PEDESTAL.stl
metaworld/envs/assets/meshes/sawyer/sawyer_ft/base.DAE
metaworld/envs/assets/meshes/sawyer/sawyer_ft/base.stl
metaworld/envs/assets/meshes/sawyer/sawyer_ft/head.DAE
metaworld/envs/assets/meshes/sawyer/sawyer_ft/head.stl
metaworld/envs/assets/meshes/sawyer/sawyer_ft/l0.DAE
metaworld/envs/assets/meshes/sawyer/sawyer_ft/l0.stl
metaworld/envs/assets/meshes/sawyer/sawyer_ft/l1.DAE
metaworld/envs/assets/meshes/sawyer/sawyer_ft/l1.stl
metaworld/envs/assets/meshes/sawyer/sawyer_ft/l2.DAE
metaworld/envs/assets/meshes/sawyer/sawyer_ft/l2.stl
metaworld/envs/assets/meshes/sawyer/sawyer_ft/l3.DAE
metaworld/envs/assets/meshes/sawyer/sawyer_ft/l3.stl
metaworld/envs/assets/meshes/sawyer/sawyer_ft/l4.DAE
metaworld/envs/assets/meshes/sawyer/sawyer_ft/l4.stl
metaworld/envs/assets/meshes/sawyer/sawyer_ft/l5.DAE
metaworld/envs/assets/meshes/sawyer/sawyer_ft/l5.stl
metaworld/envs/assets/meshes/sawyer/sawyer_ft/l6.DAE
metaworld/envs/assets/meshes/sawyer/sawyer_ft/l6.stl
metaworld/envs/assets/meshes/sawyer/sawyer_mp1/l6.DAE
metaworld/envs/assets/meshes/sawyer/sawyer_mp1/l6.stl
metaworld/envs/assets/meshes/sawyer/sawyer_mp3/l0.DAE
metaworld/envs/assets/meshes/sawyer/sawyer_mp3/l0.stl
metaworld/envs/assets/meshes/sawyer/sawyer_mp3/l1.DAE
metaworld/envs/assets/meshes/sawyer/sawyer_mp3/l1.stl
metaworld/envs/assets/meshes/sawyer/sawyer_pv/base.DAE
metaworld/envs/assets/meshes/sawyer/sawyer_pv/base.stl
metaworld/envs/assets/meshes/sawyer/sawyer_pv/head.DAE
metaworld/envs/assets/meshes/sawyer/sawyer_pv/head.stl
metaworld/envs/assets/meshes/sawyer/sawyer_pv/l0.DAE
metaworld/envs/assets/meshes/sawyer/sawyer_pv/l0.stl
metaworld/envs/assets/meshes/sawyer/sawyer_pv/l1.DAE
metaworld/envs/assets/meshes/sawyer/sawyer_pv/l1.stl
metaworld/envs/assets/meshes/sawyer/sawyer_pv/l2.DAE
metaworld/envs/assets/meshes/sawyer/sawyer_pv/l2.stl
metaworld/envs/assets/meshes/sawyer/sawyer_pv/l3.DAE
metaworld/envs/assets/meshes/sawyer/sawyer_pv/l3.stl
metaworld/envs/assets/meshes/sawyer/sawyer_pv/l4.DAE
metaworld/envs/assets/meshes/sawyer/sawyer_pv/l4.stl
metaworld/envs/assets/meshes/sawyer/sawyer_pv/l5.DAE
metaworld/envs/assets/meshes/sawyer/sawyer_pv/l5.stl
metaworld/envs/assets/meshes/sawyer/sawyer_pv/l6.DAE
metaworld/envs/assets/meshes/sawyer/sawyer_pv/l6.stl
metaworld/envs/assets/meshes/sawyer/sawyer_pv/pedestal.DAE
metaworld/envs/assets/meshes/sawyer/sawyer_pv/pedestal.stl
metaworld/envs/assets/multi_object_sawyer_xyz/door_config.xml
metaworld/envs/assets/multi_object_sawyer_xyz/door_hook_config.xml
metaworld/envs/assets/multi_object_sawyer_xyz/sawyer_2_push_puck.xml
metaworld/envs/assets/multi_object_sawyer_xyz/sawyer_door.xml
metaworld/envs/assets/multi_object_sawyer_xyz/sawyer_door_pull.xml
metaworld/envs/assets/multi_object_sawyer_xyz/sawyer_door_pull_30.xml
metaworld/envs/assets/multi_object_sawyer_xyz/sawyer_door_pull_60.xml
metaworld/envs/assets/multi_object_sawyer_xyz/sawyer_door_pull_hook.xml
metaworld/envs/assets/multi_object_sawyer_xyz/sawyer_door_pull_hook_30.xml
metaworld/envs/assets/multi_object_sawyer_xyz/sawyer_door_pull_hook_45.xml
metaworld/envs/assets/multi_object_sawyer_xyz/sawyer_grasp.xml
metaworld/envs/assets/multi_object_sawyer_xyz/sawyer_multiobj.xml
metaworld/envs/assets/multi_object_sawyer_xyz/sawyer_pick_and_place.xml
metaworld/envs/assets/multi_object_sawyer_xyz/sawyer_pick_and_place_hidden_arm.xml
metaworld/envs/assets/multi_object_sawyer_xyz/sawyer_push_puck.xml
metaworld/envs/assets/multi_object_sawyer_xyz/sawyer_push_two_puck.xml
metaworld/envs/assets/multi_object_sawyer_xyz/sawyer_reach.xml
metaworld/envs/assets/multi_object_sawyer_xyz/sawyer_reach_torque.xml
metaworld/envs/assets/multi_object_sawyer_xyz/sawyer_wsg_base.xml
metaworld/envs/assets/multi_object_sawyer_xyz/sawyer_xyz_base.xml
metaworld/envs/assets/multi_object_sawyer_xyz/sawyer_xyz_base_door_hook.xml
metaworld/envs/assets/multi_object_sawyer_xyz/sawyer_xyz_base_hidden_arm.xml
metaworld/envs/assets/multi_object_sawyer_xyz/sawyer_xyz_base_small_table.xml
metaworld/envs/assets/multi_object_sawyer_xyz/sawyer_xyz_bin_base.xml
metaworld/envs/assets/multi_object_sawyer_xyz/sawyer_xyz_bin_base_gripper.xml
metaworld/envs/assets/multi_object_sawyer_xyz/shared_config.xml
metaworld/envs/assets/multiobject_models/cartgripper.xml
metaworld/envs/assets/multiobject_models/cartgripper_getflows.xml
metaworld/envs/assets/multiobject_models/cartgripper_grasp.xml
metaworld/envs/assets/multiobject_models/cartgripper_noautogen.xml
metaworld/envs/assets/multiobject_models/cartgripper_updown.xml
metaworld/envs/assets/multiobject_models/cartgripper_updown_2cam.xml
metaworld/envs/assets/multiobject_models/cartgripper_updown_2cam_noautogen.xml
metaworld/envs/assets/multiobject_models/cartgripper_updown_rot.xml
metaworld/envs/assets/multiobject_models/cartgripper_updown_whitefingers.xml
metaworld/envs/assets/multiobject_models/generate_touch_sensors.py
metaworld/envs/assets/multiobject_models/pushing2d.xml
metaworld/envs/assets/multiobject_models/pushing2d_controller.xml
metaworld/envs/assets/multiobject_models/pushing2d_controller_nomarkers.xml
metaworld/envs/assets/multiobject_models/pushing2d_controller_touchsensor.xml
metaworld/envs/assets/multiobject_models/pushing2d_controller_touchsensor_nomarkers.xml
metaworld/envs/assets/multiobject_models/pushing2d_touch.xml
metaworld/envs/assets/multiobject_models/touchsensor.xml
metaworld/envs/assets/multiobject_models/Bowl/Bowl.off
metaworld/envs/assets/multiobject_models/Bowl/Bowl.stl
metaworld/envs/assets/multiobject_models/Bowl/Bowl.wrl
metaworld/envs/assets/multiobject_models/Bowl/Bowl_GM.stl
metaworld/envs/assets/multiobject_models/Bowl/Camera.stl
metaworld/envs/assets/multiobject_models/Bowl/Lamp.stl
metaworld/envs/assets/multiobject_models/Bowl/Shape_IndexedFaceSet.stl
metaworld/envs/assets/multiobject_models/Bowl/Shape_IndexedFaceSet_001.stl
metaworld/envs/assets/multiobject_models/Bowl/Shape_IndexedFaceSet_002.stl
metaworld/envs/assets/multiobject_models/Bowl/Shape_IndexedFaceSet_003.stl
metaworld/envs/assets/multiobject_models/Bowl/Shape_IndexedFaceSet_004.stl
metaworld/envs/assets/multiobject_models/Bowl/Shape_IndexedFaceSet_005.stl
metaworld/envs/assets/multiobject_models/Bowl/Shape_IndexedFaceSet_006.stl
metaworld/envs/assets/multiobject_models/Bowl/Shape_IndexedFaceSet_007.stl
metaworld/envs/assets/multiobject_models/Bowl/Shape_IndexedFaceSet_008.stl
metaworld/envs/assets/multiobject_models/Bowl/Shape_IndexedFaceSet_009.stl
metaworld/envs/assets/multiobject_models/Bowl/Shape_IndexedFaceSet_010.stl
metaworld/envs/assets/multiobject_models/Bowl/Shape_IndexedFaceSet_011.stl
metaworld/envs/assets/multiobject_models/Bowl/Shape_IndexedFaceSet_012.stl
metaworld/envs/assets/multiobject_models/Bowl/Shape_IndexedFaceSet_013.stl
metaworld/envs/assets/multiobject_models/Bowl/Shape_IndexedFaceSet_014.stl
metaworld/envs/assets/multiobject_models/Bowl/Shape_IndexedFaceSet_015.stl
metaworld/envs/assets/multiobject_models/Bowl/Shape_IndexedFaceSet_016.stl
metaworld/envs/assets/multiobject_models/Bowl/Shape_IndexedFaceSet_017.stl
metaworld/envs/assets/multiobject_models/Bowl/Shape_IndexedFaceSet_018.stl
metaworld/envs/assets/multiobject_models/Bowl/Shape_IndexedFaceSet_019.stl
metaworld/envs/assets/multiobject_models/Bowl/Shape_IndexedFaceSet_020.stl
metaworld/envs/assets/multiobject_models/Bowl/Shape_IndexedFaceSet_021.stl
metaworld/envs/assets/multiobject_models/Bowl/Shape_IndexedFaceSet_022.stl
metaworld/envs/assets/multiobject_models/Bowl/Shape_IndexedFaceSet_023.stl
metaworld/envs/assets/multiobject_models/Bowl/Shape_IndexedFaceSet_024.stl
metaworld/envs/assets/multiobject_models/Bowl/Shape_IndexedFaceSet_025.stl
metaworld/envs/assets/multiobject_models/Bowl/Shape_IndexedFaceSet_026.stl
metaworld/envs/assets/multiobject_models/Bowl/Shape_IndexedFaceSet_027.stl
metaworld/envs/assets/multiobject_models/Bowl/Shape_IndexedFaceSet_028.stl
metaworld/envs/assets/multiobject_models/Bowl/Shape_IndexedFaceSet_029.stl
metaworld/envs/assets/multiobject_models/Bowl/Shape_IndexedFaceSet_030.stl
metaworld/envs/assets/multiobject_models/Bowl/Shape_IndexedFaceSet_031.stl
metaworld/envs/assets/multiobject_models/Bowl/Shape_IndexedFaceSet_032.stl
metaworld/envs/assets/multiobject_models/Bowl/Shape_IndexedFaceSet_033.stl
metaworld/envs/assets/multiobject_models/Bowl/Shape_IndexedFaceSet_034.stl
metaworld/envs/assets/multiobject_models/Bowl/Shape_IndexedFaceSet_035.stl
metaworld/envs/assets/multiobject_models/ElephantBowl/Camera.stl
metaworld/envs/assets/multiobject_models/ElephantBowl/ElephantBowl.off
metaworld/envs/assets/multiobject_models/ElephantBowl/ElephantBowl.stl
metaworld/envs/assets/multiobject_models/ElephantBowl/ElephantBowl.wrl
metaworld/envs/assets/multiobject_models/ElephantBowl/ElephantBowl_GM.stl
metaworld/envs/assets/multiobject_models/ElephantBowl/Lamp.stl
metaworld/envs/assets/multiobject_models/ElephantBowl/Shape_IndexedFaceSet.stl
metaworld/envs/assets/multiobject_models/ElephantBowl/Shape_IndexedFaceSet_001.stl
metaworld/envs/assets/multiobject_models/ElephantBowl/Shape_IndexedFaceSet_002.stl
metaworld/envs/assets/multiobject_models/ElephantBowl/Shape_IndexedFaceSet_003.stl
metaworld/envs/assets/multiobject_models/ElephantBowl/Shape_IndexedFaceSet_004.stl
metaworld/envs/assets/multiobject_models/Fork/Camera.stl
metaworld/envs/assets/multiobject_models/Fork/Fork.off
metaworld/envs/assets/multiobject_models/Fork/Fork.stl
metaworld/envs/assets/multiobject_models/Fork/Fork.wrl
metaworld/envs/assets/multiobject_models/Fork/Fork_GM.stl
metaworld/envs/assets/multiobject_models/Fork/Lamp.stl
metaworld/envs/assets/multiobject_models/Fork/Shape_IndexedFaceSet.stl
metaworld/envs/assets/multiobject_models/Fork/Shape_IndexedFaceSet_001.stl
metaworld/envs/assets/multiobject_models/Fork/Shape_IndexedFaceSet_002.stl
metaworld/envs/assets/multiobject_models/Fork/Shape_IndexedFaceSet_003.stl
metaworld/envs/assets/multiobject_models/Fork/Shape_IndexedFaceSet_004.stl
metaworld/envs/assets/multiobject_models/Fork/Shape_IndexedFaceSet_005.stl
metaworld/envs/assets/multiobject_models/Fork/Shape_IndexedFaceSet_006.stl
metaworld/envs/assets/multiobject_models/Fork/Shape_IndexedFaceSet_007.stl
metaworld/envs/assets/multiobject_models/GlassBowl/Camera.stl
metaworld/envs/assets/multiobject_models/GlassBowl/GlassBowl.off
metaworld/envs/assets/multiobject_models/GlassBowl/GlassBowl.stl
metaworld/envs/assets/multiobject_models/GlassBowl/GlassBowl.wrl
metaworld/envs/assets/multiobject_models/GlassBowl/GlassBowl_GM.stl
metaworld/envs/assets/multiobject_models/GlassBowl/Lamp.stl
metaworld/envs/assets/multiobject_models/GlassBowl/Shape_IndexedFaceSet.stl
metaworld/envs/assets/multiobject_models/GlassBowl/Shape_IndexedFaceSet_001.stl
metaworld/envs/assets/multiobject_models/GlassBowl/Shape_IndexedFaceSet_002.stl
metaworld/envs/assets/multiobject_models/GlassBowl/Shape_IndexedFaceSet_003.stl
metaworld/envs/assets/multiobject_models/GlassBowl/Shape_IndexedFaceSet_004.stl
metaworld/envs/assets/multiobject_models/GlassBowl/Shape_IndexedFaceSet_005.stl
metaworld/envs/assets/multiobject_models/GlassBowl/Shape_IndexedFaceSet_006.stl
metaworld/envs/assets/multiobject_models/GlassBowl/Shape_IndexedFaceSet_007.stl
metaworld/envs/assets/multiobject_models/GlassBowl/Shape_IndexedFaceSet_008.stl
metaworld/envs/assets/multiobject_models/GlassBowl/Shape_IndexedFaceSet_009.stl
metaworld/envs/assets/multiobject_models/GlassBowl/Shape_IndexedFaceSet_010.stl
metaworld/envs/assets/multiobject_models/GlassBowl/Shape_IndexedFaceSet_011.stl
metaworld/envs/assets/multiobject_models/GlassBowl/Shape_IndexedFaceSet_012.stl
metaworld/envs/assets/multiobject_models/GlassBowl/Shape_IndexedFaceSet_013.stl
metaworld/envs/assets/multiobject_models/GlassBowl/Shape_IndexedFaceSet_014.stl
metaworld/envs/assets/multiobject_models/GlassBowl/Shape_IndexedFaceSet_015.stl
metaworld/envs/assets/multiobject_models/GlassBowl/Shape_IndexedFaceSet_016.stl
metaworld/envs/assets/multiobject_models/GlassBowl/Shape_IndexedFaceSet_017.stl
metaworld/envs/assets/multiobject_models/GlassBowl/Shape_IndexedFaceSet_018.stl
metaworld/envs/assets/multiobject_models/GlassBowl/Shape_IndexedFaceSet_019.stl
metaworld/envs/assets/multiobject_models/GlassBowl/Shape_IndexedFaceSet_020.stl
metaworld/envs/assets/multiobject_models/GlassBowl/Shape_IndexedFaceSet_021.stl
metaworld/envs/assets/multiobject_models/GlassBowl/Shape_IndexedFaceSet_022.stl
metaworld/envs/assets/multiobject_models/GlassBowl/Shape_IndexedFaceSet_023.stl
metaworld/envs/assets/multiobject_models/GlassBowl/Shape_IndexedFaceSet_024.stl
metaworld/envs/assets/multiobject_models/GlassBowl/Shape_IndexedFaceSet_025.stl
metaworld/envs/assets/multiobject_models/GlassBowl/Shape_IndexedFaceSet_026.stl
metaworld/envs/assets/multiobject_models/GlassBowl/Shape_IndexedFaceSet_027.stl
metaworld/envs/assets/multiobject_models/GlassBowl/Shape_IndexedFaceSet_028.stl
metaworld/envs/assets/multiobject_models/GlassBowl/Shape_IndexedFaceSet_029.stl
metaworld/envs/assets/multiobject_models/GlassBowl/Shape_IndexedFaceSet_030.stl
metaworld/envs/assets/multiobject_models/GlassBowl/Shape_IndexedFaceSet_031.stl
metaworld/envs/assets/multiobject_models/GlassBowl/Shape_IndexedFaceSet_032.stl
metaworld/envs/assets/multiobject_models/GlassBowl/Shape_IndexedFaceSet_033.stl
metaworld/envs/assets/multiobject_models/GlassBowl/Shape_IndexedFaceSet_034.stl
metaworld/envs/assets/multiobject_models/Knife/Camera.stl
metaworld/envs/assets/multiobject_models/Knife/Knife.off
metaworld/envs/assets/multiobject_models/Knife/Knife.stl
metaworld/envs/assets/multiobject_models/Knife/Knife.wrl
metaworld/envs/assets/multiobject_models/Knife/Knife_GM.stl
metaworld/envs/assets/multiobject_models/Knife/Lamp.stl
metaworld/envs/assets/multiobject_models/Knife/Shape_IndexedFaceSet.stl
metaworld/envs/assets/multiobject_models/LotusBowl01/Camera.stl
metaworld/envs/assets/multiobject_models/LotusBowl01/Lamp.stl
metaworld/envs/assets/multiobject_models/LotusBowl01/LotusBowl01.off
metaworld/envs/assets/multiobject_models/LotusBowl01/LotusBowl01.stl
metaworld/envs/assets/multiobject_models/LotusBowl01/LotusBowl01.wrl
metaworld/envs/assets/multiobject_models/LotusBowl01/LotusBowl01_GM.stl
metaworld/envs/assets/multiobject_models/LotusBowl01/Shape_IndexedFaceSet.stl
metaworld/envs/assets/multiobject_models/LotusBowl01/Shape_IndexedFaceSet_001.stl
metaworld/envs/assets/multiobject_models/LotusBowl01/Shape_IndexedFaceSet_002.stl
metaworld/envs/assets/multiobject_models/LotusBowl01/Shape_IndexedFaceSet_003.stl
metaworld/envs/assets/multiobject_models/LotusBowl01/Shape_IndexedFaceSet_004.stl
metaworld/envs/assets/multiobject_models/LotusBowl01/Shape_IndexedFaceSet_005.stl
metaworld/envs/assets/multiobject_models/LotusBowl01/Shape_IndexedFaceSet_006.stl
metaworld/envs/assets/multiobject_models/LotusBowl01/Shape_IndexedFaceSet_007.stl
metaworld/envs/assets/multiobject_models/LotusBowl01/Shape_IndexedFaceSet_008.stl
metaworld/envs/assets/multiobject_models/LotusBowl01/Shape_IndexedFaceSet_009.stl
metaworld/envs/assets/multiobject_models/LotusBowl01/Shape_IndexedFaceSet_010.stl
metaworld/envs/assets/multiobject_models/LotusBowl01/Shape_IndexedFaceSet_011.stl
metaworld/envs/assets/multiobject_models/LotusBowl01/Shape_IndexedFaceSet_012.stl
metaworld/envs/assets/multiobject_models/LotusBowl01/Shape_IndexedFaceSet_013.stl
metaworld/envs/assets/multiobject_models/LotusBowl01/Shape_IndexedFaceSet_014.stl
metaworld/envs/assets/multiobject_models/LotusBowl01/Shape_IndexedFaceSet_015.stl
metaworld/envs/assets/multiobject_models/LotusBowl01/Shape_IndexedFaceSet_016.stl
metaworld/envs/assets/multiobject_models/LotusBowl01/Shape_IndexedFaceSet_017.stl
metaworld/envs/assets/multiobject_models/LotusBowl01/Shape_IndexedFaceSet_018.stl
metaworld/envs/assets/multiobject_models/LotusBowl01/Shape_IndexedFaceSet_019.stl
metaworld/envs/assets/multiobject_models/LotusBowl01/Shape_IndexedFaceSet_020.stl
metaworld/envs/assets/multiobject_models/LotusBowl01/Shape_IndexedFaceSet_021.stl
metaworld/envs/assets/multiobject_models/LotusBowl01/Shape_IndexedFaceSet_022.stl
metaworld/envs/assets/multiobject_models/LotusBowl01/Shape_IndexedFaceSet_023.stl
metaworld/envs/assets/multiobject_models/LotusBowl01/Shape_IndexedFaceSet_024.stl
metaworld/envs/assets/multiobject_models/LotusBowl01/Shape_IndexedFaceSet_025.stl
metaworld/envs/assets/multiobject_models/LotusBowl01/Shape_IndexedFaceSet_026.stl
metaworld/envs/assets/multiobject_models/LotusBowl01/Shape_IndexedFaceSet_027.stl
metaworld/envs/assets/multiobject_models/LotusBowl01/Shape_IndexedFaceSet_028.stl
metaworld/envs/assets/multiobject_models/LotusBowl01/Shape_IndexedFaceSet_029.stl
metaworld/envs/assets/multiobject_models/LotusBowl01/Shape_IndexedFaceSet_030.stl
metaworld/envs/assets/multiobject_models/LotusBowl01/Shape_IndexedFaceSet_031.stl
metaworld/envs/assets/multiobject_models/LotusBowl01/Shape_IndexedFaceSet_032.stl
metaworld/envs/assets/multiobject_models/LotusBowl01/Shape_IndexedFaceSet_033.stl
metaworld/envs/assets/multiobject_models/LotusBowl01/Shape_IndexedFaceSet_034.stl
metaworld/envs/assets/multiobject_models/RuggedBowl/Camera.stl
metaworld/envs/assets/multiobject_models/RuggedBowl/Lamp.stl
metaworld/envs/assets/multiobject_models/RuggedBowl/RuggedBowl.off
metaworld/envs/assets/multiobject_models/RuggedBowl/RuggedBowl.stl
metaworld/envs/assets/multiobject_models/RuggedBowl/RuggedBowl.wrl
metaworld/envs/assets/multiobject_models/RuggedBowl/RuggedBowl_GM.stl
metaworld/envs/assets/multiobject_models/RuggedBowl/Shape_IndexedFaceSet.stl
metaworld/envs/assets/multiobject_models/RuggedBowl/Shape_IndexedFaceSet_001.stl
metaworld/envs/assets/multiobject_models/RuggedBowl/Shape_IndexedFaceSet_002.stl
metaworld/envs/assets/multiobject_models/RuggedBowl/Shape_IndexedFaceSet_003.stl
metaworld/envs/assets/multiobject_models/RuggedBowl/Shape_IndexedFaceSet_004.stl
metaworld/envs/assets/multiobject_models/RuggedBowl/Shape_IndexedFaceSet_005.stl
metaworld/envs/assets/multiobject_models/RuggedBowl/Shape_IndexedFaceSet_006.stl
metaworld/envs/assets/multiobject_models/RuggedBowl/Shape_IndexedFaceSet_007.stl
metaworld/envs/assets/multiobject_models/RuggedBowl/Shape_IndexedFaceSet_008.stl
metaworld/envs/assets/multiobject_models/RuggedBowl/Shape_IndexedFaceSet_009.stl
metaworld/envs/assets/multiobject_models/RuggedBowl/Shape_IndexedFaceSet_010.stl
metaworld/envs/assets/multiobject_models/RuggedBowl/Shape_IndexedFaceSet_011.stl
metaworld/envs/assets/multiobject_models/RuggedBowl/Shape_IndexedFaceSet_012.stl
metaworld/envs/assets/multiobject_models/RuggedBowl/Shape_IndexedFaceSet_013.stl
metaworld/envs/assets/multiobject_models/ServingBowl/Camera.stl
metaworld/envs/assets/multiobject_models/ServingBowl/Lamp.stl
metaworld/envs/assets/multiobject_models/ServingBowl/ServingBowl.off
metaworld/envs/assets/multiobject_models/ServingBowl/ServingBowl.stl
metaworld/envs/assets/multiobject_models/ServingBowl/ServingBowl.wrl
metaworld/envs/assets/multiobject_models/ServingBowl/ServingBowl_GM.stl
metaworld/envs/assets/multiobject_models/ServingBowl/Shape_IndexedFaceSet.stl
metaworld/envs/assets/multiobject_models/ServingBowl/Shape_IndexedFaceSet_001.stl
metaworld/envs/assets/multiobject_models/ServingBowl/Shape_IndexedFaceSet_002.stl
metaworld/envs/assets/multiobject_models/ServingBowl/Shape_IndexedFaceSet_003.stl
metaworld/envs/assets/multiobject_models/ServingBowl/Shape_IndexedFaceSet_004.stl
metaworld/envs/assets/multiobject_models/ServingBowl/Shape_IndexedFaceSet_005.stl
metaworld/envs/assets/multiobject_models/ServingBowl/Shape_IndexedFaceSet_006.stl
metaworld/envs/assets/multiobject_models/ServingBowl/Shape_IndexedFaceSet_007.stl
metaworld/envs/assets/multiobject_models/ServingBowl/Shape_IndexedFaceSet_008.stl
metaworld/envs/assets/multiobject_models/ServingBowl/Shape_IndexedFaceSet_009.stl
metaworld/envs/assets/multiobject_models/ServingBowl/Shape_IndexedFaceSet_010.stl
metaworld/envs/assets/multiobject_models/ServingBowl/Shape_IndexedFaceSet_011.stl
metaworld/envs/assets/multiobject_models/ServingBowl/Shape_IndexedFaceSet_012.stl
metaworld/envs/assets/multiobject_models/ServingBowl/Shape_IndexedFaceSet_013.stl
metaworld/envs/assets/multiobject_models/ServingBowl/Shape_IndexedFaceSet_014.stl
metaworld/envs/assets/multiobject_models/ServingBowl/Shape_IndexedFaceSet_015.stl
metaworld/envs/assets/multiobject_models/ServingBowl/Shape_IndexedFaceSet_016.stl
metaworld/envs/assets/multiobject_models/ServingBowl/Shape_IndexedFaceSet_017.stl
metaworld/envs/assets/multiobject_models/ServingBowl/Shape_IndexedFaceSet_018.stl
metaworld/envs/assets/multiobject_models/ServingBowl/Shape_IndexedFaceSet_019.stl
metaworld/envs/assets/multiobject_models/ServingBowl/Shape_IndexedFaceSet_020.stl
metaworld/envs/assets/multiobject_models/ServingBowl/Shape_IndexedFaceSet_021.stl
metaworld/envs/assets/multiobject_models/ServingBowl/Shape_IndexedFaceSet_022.stl
metaworld/envs/assets/multiobject_models/ServingBowl/Shape_IndexedFaceSet_023.stl
metaworld/envs/assets/multiobject_models/ServingBowl/Shape_IndexedFaceSet_024.stl
metaworld/envs/assets/multiobject_models/ServingBowl/Shape_IndexedFaceSet_025.stl
metaworld/envs/assets/multiobject_models/ServingBowl/Shape_IndexedFaceSet_026.stl
metaworld/envs/assets/multiobject_models/ServingBowl/Shape_IndexedFaceSet_027.stl
metaworld/envs/assets/multiobject_models/ServingBowl/Shape_IndexedFaceSet_028.stl
metaworld/envs/assets/multiobject_models/ServingBowl/Shape_IndexedFaceSet_029.stl
metaworld/envs/assets/multiobject_models/ServingBowl/Shape_IndexedFaceSet_030.stl
metaworld/envs/assets/multiobject_models/ServingBowl/Shape_IndexedFaceSet_031.stl
metaworld/envs/assets/multiobject_models/ServingBowl/Shape_IndexedFaceSet_032.stl
metaworld/envs/assets/multiobject_models/ServingBowl/Shape_IndexedFaceSet_033.stl
metaworld/envs/assets/multiobject_models/ServingBowl/Shape_IndexedFaceSet_034.stl
metaworld/envs/assets/multiobject_models/ServingBowl/Shape_IndexedFaceSet_035.stl
metaworld/envs/assets/multiobject_models/ServingBowl/Shape_IndexedFaceSet_036.stl
metaworld/envs/assets/multiobject_models/ServingBowl/Shape_IndexedFaceSet_037.stl
metaworld/envs/assets/multiobject_models/ServingBowl/Shape_IndexedFaceSet_038.stl
metaworld/envs/assets/multiobject_models/ServingBowl/Shape_IndexedFaceSet_039.stl
metaworld/envs/assets/multiobject_models/ServingBowl/Shape_IndexedFaceSet_040.stl
metaworld/envs/assets/multiobject_models/ServingBowl/Shape_IndexedFaceSet_041.stl
metaworld/envs/assets/multiobject_models/ServingBowl/Shape_IndexedFaceSet_042.stl
metaworld/envs/assets/multiobject_models/ServingBowl/Shape_IndexedFaceSet_043.stl
metaworld/envs/assets/multiobject_models/ServingBowl/Shape_IndexedFaceSet_044.stl
metaworld/envs/assets/multiobject_models/ServingBowl/Shape_IndexedFaceSet_045.stl
metaworld/envs/assets/multiobject_models/ServingBowl/Shape_IndexedFaceSet_046.stl
metaworld/envs/assets/multiobject_models/ServingBowl/Shape_IndexedFaceSet_047.stl
metaworld/envs/assets/multiobject_models/ServingBowl/Shape_IndexedFaceSet_048.stl
metaworld/envs/assets/multiobject_models/ServingBowl/Shape_IndexedFaceSet_049.stl
metaworld/envs/assets/multiobject_models/Spoon/Camera.stl
metaworld/envs/assets/multiobject_models/Spoon/Lamp.stl
metaworld/envs/assets/multiobject_models/Spoon/Shape_IndexedFaceSet.stl
metaworld/envs/assets/multiobject_models/Spoon/Shape_IndexedFaceSet_001.stl
metaworld/envs/assets/multiobject_models/Spoon/Shape_IndexedFaceSet_002.stl
metaworld/envs/assets/multiobject_models/Spoon/Shape_IndexedFaceSet_003.stl
metaworld/envs/assets/multiobject_models/Spoon/Shape_IndexedFaceSet_004.stl
metaworld/envs/assets/multiobject_models/Spoon/Shape_IndexedFaceSet_005.stl
metaworld/envs/assets/multiobject_models/Spoon/Shape_IndexedFaceSet_006.stl
metaworld/envs/assets/multiobject_models/Spoon/Shape_IndexedFaceSet_007.stl
metaworld/envs/assets/multiobject_models/Spoon/Shape_IndexedFaceSet_008.stl
metaworld/envs/assets/multiobject_models/Spoon/Shape_IndexedFaceSet_009.stl
metaworld/envs/assets/multiobject_models/Spoon/Shape_IndexedFaceSet_010.stl
metaworld/envs/assets/multiobject_models/Spoon/Spoon.off
metaworld/envs/assets/multiobject_models/Spoon/Spoon.stl
metaworld/envs/assets/multiobject_models/Spoon/Spoon.wrl
metaworld/envs/assets/multiobject_models/Spoon/Spoon_GM.stl
metaworld/envs/assets/multiobject_models/sawyer_assets/meshes/sawyer/GUIDE_WSG50_110.stl
metaworld/envs/assets/multiobject_models/sawyer_assets/meshes/sawyer/WSG-FMF.stl
metaworld/envs/assets/multiobject_models/sawyer_assets/meshes/sawyer/WSG50_110.stl
metaworld/envs/assets/multiobject_models/sawyer_assets/meshes/sawyer/base.stl
metaworld/envs/assets/multiobject_models/sawyer_assets/meshes/sawyer/head.stl
metaworld/envs/assets/multiobject_models/sawyer_assets/meshes/sawyer/l0.stl
metaworld/envs/assets/multiobject_models/sawyer_assets/meshes/sawyer/l1.stl
metaworld/envs/assets/multiobject_models/sawyer_assets/meshes/sawyer/l2.stl
metaworld/envs/assets/multiobject_models/sawyer_assets/meshes/sawyer/l3.stl
metaworld/envs/assets/multiobject_models/sawyer_assets/meshes/sawyer/l4.stl
metaworld/envs/assets/multiobject_models/sawyer_assets/meshes/sawyer/l5.stl
metaworld/envs/assets/multiobject_models/sawyer_assets/meshes/sawyer/l6.stl
metaworld/envs/assets/multiobject_models/sawyer_assets/meshes/sawyer/pedestal.stl
metaworld/envs/assets/multiobject_models/sawyer_assets/meshes/sawyer/sawyer_ft/PEDESTAL.DAE
metaworld/envs/assets/multiobject_models/sawyer_assets/meshes/sawyer/sawyer_ft/PEDESTAL.stl
metaworld/envs/assets/multiobject_models/sawyer_assets/meshes/sawyer/sawyer_ft/base.DAE
metaworld/envs/assets/multiobject_models/sawyer_assets/meshes/sawyer/sawyer_ft/base.stl
metaworld/envs/assets/multiobject_models/sawyer_assets/meshes/sawyer/sawyer_ft/head.DAE
metaworld/envs/assets/multiobject_models/sawyer_assets/meshes/sawyer/sawyer_ft/head.stl
metaworld/envs/assets/multiobject_models/sawyer_assets/meshes/sawyer/sawyer_ft/l0.DAE
metaworld/envs/assets/multiobject_models/sawyer_assets/meshes/sawyer/sawyer_ft/l0.stl
metaworld/envs/assets/multiobject_models/sawyer_assets/meshes/sawyer/sawyer_ft/l1.DAE
metaworld/envs/assets/multiobject_models/sawyer_assets/meshes/sawyer/sawyer_ft/l1.stl
metaworld/envs/assets/multiobject_models/sawyer_assets/meshes/sawyer/sawyer_ft/l2.DAE
metaworld/envs/assets/multiobject_models/sawyer_assets/meshes/sawyer/sawyer_ft/l2.stl
metaworld/envs/assets/multiobject_models/sawyer_assets/meshes/sawyer/sawyer_ft/l3.DAE
metaworld/envs/assets/multiobject_models/sawyer_assets/meshes/sawyer/sawyer_ft/l3.stl
metaworld/envs/assets/multiobject_models/sawyer_assets/meshes/sawyer/sawyer_ft/l4.DAE
metaworld/envs/assets/multiobject_models/sawyer_assets/meshes/sawyer/sawyer_ft/l4.stl
metaworld/envs/assets/multiobject_models/sawyer_assets/meshes/sawyer/sawyer_ft/l5.DAE
metaworld/envs/assets/multiobject_models/sawyer_assets/meshes/sawyer/sawyer_ft/l5.stl
metaworld/envs/assets/multiobject_models/sawyer_assets/meshes/sawyer/sawyer_ft/l6.DAE
metaworld/envs/assets/multiobject_models/sawyer_assets/meshes/sawyer/sawyer_ft/l6.stl
metaworld/envs/assets/multiobject_models/sawyer_assets/meshes/sawyer/sawyer_mp1/l6.DAE
metaworld/envs/assets/multiobject_models/sawyer_assets/meshes/sawyer/sawyer_mp1/l6.stl
metaworld/envs/assets/multiobject_models/sawyer_assets/meshes/sawyer/sawyer_mp3/l0.DAE
metaworld/envs/assets/multiobject_models/sawyer_assets/meshes/sawyer/sawyer_mp3/l0.stl
metaworld/envs/assets/multiobject_models/sawyer_assets/meshes/sawyer/sawyer_mp3/l1.DAE
metaworld/envs/assets/multiobject_models/sawyer_assets/meshes/sawyer/sawyer_mp3/l1.stl
metaworld/envs/assets/multiobject_models/sawyer_assets/meshes/sawyer/sawyer_pv/base.DAE
metaworld/envs/assets/multiobject_models/sawyer_assets/meshes/sawyer/sawyer_pv/base.stl
metaworld/envs/assets/multiobject_models/sawyer_assets/meshes/sawyer/sawyer_pv/head.DAE
metaworld/envs/assets/multiobject_models/sawyer_assets/meshes/sawyer/sawyer_pv/head.stl
metaworld/envs/assets/multiobject_models/sawyer_assets/meshes/sawyer/sawyer_pv/l0.DAE
metaworld/envs/assets/multiobject_models/sawyer_assets/meshes/sawyer/sawyer_pv/l0.stl
metaworld/envs/assets/multiobject_models/sawyer_assets/meshes/sawyer/sawyer_pv/l1.DAE
metaworld/envs/assets/multiobject_models/sawyer_assets/meshes/sawyer/sawyer_pv/l1.stl
metaworld/envs/assets/multiobject_models/sawyer_assets/meshes/sawyer/sawyer_pv/l2.DAE
metaworld/envs/assets/multiobject_models/sawyer_assets/meshes/sawyer/sawyer_pv/l2.stl
metaworld/envs/assets/multiobject_models/sawyer_assets/meshes/sawyer/sawyer_pv/l3.DAE
metaworld/envs/assets/multiobject_models/sawyer_assets/meshes/sawyer/sawyer_pv/l3.stl
metaworld/envs/assets/multiobject_models/sawyer_assets/meshes/sawyer/sawyer_pv/l4.DAE
metaworld/envs/assets/multiobject_models/sawyer_assets/meshes/sawyer/sawyer_pv/l4.stl
metaworld/envs/assets/multiobject_models/sawyer_assets/meshes/sawyer/sawyer_pv/l5.DAE
metaworld/envs/assets/multiobject_models/sawyer_assets/meshes/sawyer/sawyer_pv/l5.stl
metaworld/envs/assets/multiobject_models/sawyer_assets/meshes/sawyer/sawyer_pv/l6.DAE
metaworld/envs/assets/multiobject_models/sawyer_assets/meshes/sawyer/sawyer_pv/l6.stl
metaworld/envs/assets/multiobject_models/sawyer_assets/meshes/sawyer/sawyer_pv/pedestal.DAE
metaworld/envs/assets/multiobject_models/sawyer_assets/meshes/sawyer/sawyer_pv/pedestal.stl
metaworld/envs/assets/multiobject_models/sawyer_assets/sawyer_xyz/sawyer_grasp.xml
metaworld/envs/assets/multiobject_models/sawyer_assets/sawyer_xyz/sawyer_wsg_base.xml
metaworld/envs/assets/multiobject_models/sawyer_assets/sawyer_xyz/shared_config.xml
metaworld/envs/assets/sawyer_xyz/door_config.xml
metaworld/envs/assets/sawyer_xyz/sawyer_assembly_peg.xml
metaworld/envs/assets/sawyer_xyz/sawyer_assembly_peg_horizontal.xml
metaworld/envs/assets/sawyer_xyz/sawyer_basketball.xml
metaworld/envs/assets/sawyer_xyz/sawyer_bin_picking.xml
metaworld/envs/assets/sawyer_xyz/sawyer_box.xml
metaworld/envs/assets/sawyer_xyz/sawyer_button_press.xml
metaworld/envs/assets/sawyer_xyz/sawyer_button_press_topdown.xml
metaworld/envs/assets/sawyer_xyz/sawyer_button_press_topdown_wall.xml
metaworld/envs/assets/sawyer_xyz/sawyer_button_press_wall.xml
metaworld/envs/assets/sawyer_xyz/sawyer_coffee.xml
metaworld/envs/assets/sawyer_xyz/sawyer_dial.xml
metaworld/envs/assets/sawyer_xyz/sawyer_door_lock.xml
metaworld/envs/assets/sawyer_xyz/sawyer_door_pull.xml
metaworld/envs/assets/sawyer_xyz/sawyer_drawer.xml
metaworld/envs/assets/sawyer_xyz/sawyer_faucet.xml
metaworld/envs/assets/sawyer_xyz/sawyer_hammer.xml
metaworld/envs/assets/sawyer_xyz/sawyer_handle_press.xml
metaworld/envs/assets/sawyer_xyz/sawyer_handle_press_sideway.xml
metaworld/envs/assets/sawyer_xyz/sawyer_laptop.xml
metaworld/envs/assets/sawyer_xyz/sawyer_lever_pull.xml
metaworld/envs/assets/sawyer_xyz/sawyer_peg_insertion_side.xml
metaworld/envs/assets/sawyer_xyz/sawyer_peg_unplug_side.xml
metaworld/envs/assets/sawyer_xyz/sawyer_pick_and_place.xml
metaworld/envs/assets/sawyer_xyz/sawyer_pick_out_of_hole.xml
metaworld/envs/assets/sawyer_xyz/sawyer_plate_slide.xml
metaworld/envs/assets/sawyer_xyz/sawyer_plate_slide_sideway.xml
metaworld/envs/assets/sawyer_xyz/sawyer_push_and_reach_mocap_goal_hidden.xml
metaworld/envs/assets/sawyer_xyz/sawyer_push_back.xml
metaworld/envs/assets/sawyer_xyz/sawyer_pusher_no_table.xml
metaworld/envs/assets/sawyer_xyz/sawyer_pusher_small_table.xml
metaworld/envs/assets/sawyer_xyz/sawyer_reach_push_pick_and_place.xml
metaworld/envs/assets/sawyer_xyz/sawyer_reach_push_pick_and_place_wall.xml
metaworld/envs/assets/sawyer_xyz/sawyer_shelf_placing.xml
metaworld/envs/assets/sawyer_xyz/sawyer_shelf_removing.xml
metaworld/envs/assets/sawyer_xyz/sawyer_soccer.xml
metaworld/envs/assets/sawyer_xyz/sawyer_stick_obj.xml
metaworld/envs/assets/sawyer_xyz/sawyer_sweep.xml
metaworld/envs/assets/sawyer_xyz/sawyer_sweep_tool.xml
metaworld/envs/assets/sawyer_xyz/sawyer_table_with_hole.xml
metaworld/envs/assets/sawyer_xyz/sawyer_table_with_hole_no_puck.xml
metaworld/envs/assets/sawyer_xyz/sawyer_window.xml
metaworld/envs/assets/sawyer_xyz/sawyer_window_horizontal.xml
metaworld/envs/assets/sawyer_xyz/sawyer_xyz_base.xml
metaworld/envs/assets/sawyer_xyz/sawyer_xyz_base_no_table.xml
metaworld/envs/assets/sawyer_xyz/shared_config.xml
metaworld/envs/assets/sawyer_xyz/visual_config.xml
metaworld/envs/assets/textures/darkwood.png
metaworld/envs/assets/textures/granite.png
metaworld/envs/assets/textures/light_wood.png
metaworld/envs/assets/textures/light_wood_v2.png
metaworld/envs/assets/textures/light_wood_v3.jpeg
metaworld/envs/assets/textures/light_wood_v3.png
metaworld/envs/assets/textures/marble.png
metaworld/envs/assets/textures/metal.png
metaworld/envs/assets/textures/navy_blue.png
metaworld/envs/assets/textures/real_door.png
metaworld/envs/assets/textures/tennis.png
metaworld/envs/assets/textures/wood.png
metaworld/envs/assets/textures/wood_light.png
metaworld/envs/mujoco/__init__.py
metaworld/envs/mujoco/cameras.py
metaworld/envs/mujoco/env_dict.py
metaworld/envs/mujoco/mujoco_env.py
metaworld/envs/mujoco/multitask_env.py
metaworld/envs/mujoco/dynamic_mjc/__init__.py
metaworld/envs/mujoco/dynamic_mjc/model_builder.py
metaworld/envs/mujoco/dynamic_mjc/rope.py
metaworld/envs/mujoco/sawyer_xyz/__init__.py
metaworld/envs/mujoco/sawyer_xyz/base.py
metaworld/envs/mujoco/sawyer_xyz/env_lists.py
metaworld/envs/mujoco/sawyer_xyz/sawyer_assembly_peg.py
metaworld/envs/mujoco/sawyer_xyz/sawyer_basketball.py
metaworld/envs/mujoco/sawyer_xyz/sawyer_bin_picking.py
metaworld/envs/mujoco/sawyer_xyz/sawyer_box_close.py
metaworld/envs/mujoco/sawyer_xyz/sawyer_button_press.py
metaworld/envs/mujoco/sawyer_xyz/sawyer_button_press_topdown.py
metaworld/envs/mujoco/sawyer_xyz/sawyer_button_press_topdown_wall.py
metaworld/envs/mujoco/sawyer_xyz/sawyer_button_press_wall.py
metaworld/envs/mujoco/sawyer_xyz/sawyer_coffee_button.py
metaworld/envs/mujoco/sawyer_xyz/sawyer_coffee_pull.py
metaworld/envs/mujoco/sawyer_xyz/sawyer_coffee_push.py
metaworld/envs/mujoco/sawyer_xyz/sawyer_dial_turn.py
metaworld/envs/mujoco/sawyer_xyz/sawyer_disassemble_peg.py
metaworld/envs/mujoco/sawyer_xyz/sawyer_door.py
metaworld/envs/mujoco/sawyer_xyz/sawyer_door_close.py
metaworld/envs/mujoco/sawyer_xyz/sawyer_door_lock.py
metaworld/envs/mujoco/sawyer_xyz/sawyer_door_unlock.py
metaworld/envs/mujoco/sawyer_xyz/sawyer_drawer_close.py
metaworld/envs/mujoco/sawyer_xyz/sawyer_drawer_open.py
metaworld/envs/mujoco/sawyer_xyz/sawyer_faucet_close.py
metaworld/envs/mujoco/sawyer_xyz/sawyer_faucet_open.py
metaworld/envs/mujoco/sawyer_xyz/sawyer_hammer.py
metaworld/envs/mujoco/sawyer_xyz/sawyer_hand_insert.py
metaworld/envs/mujoco/sawyer_xyz/sawyer_handle_press.py
metaworld/envs/mujoco/sawyer_xyz/sawyer_handle_press_side.py
metaworld/envs/mujoco/sawyer_xyz/sawyer_handle_pull.py
metaworld/envs/mujoco/sawyer_xyz/sawyer_handle_pull_side.py
metaworld/envs/mujoco/sawyer_xyz/sawyer_lever_pull.py
metaworld/envs/mujoco/sawyer_xyz/sawyer_peg_insertion_side.py
metaworld/envs/mujoco/sawyer_xyz/sawyer_peg_unplug_side.py
metaworld/envs/mujoco/sawyer_xyz/sawyer_pick_and_place.py
metaworld/envs/mujoco/sawyer_xyz/sawyer_pick_and_place_wsg.py
metaworld/envs/mujoco/sawyer_xyz/sawyer_pick_out_of_hole.py
metaworld/envs/mujoco/sawyer_xyz/sawyer_plate_slide.py
metaworld/envs/mujoco/sawyer_xyz/sawyer_plate_slide_back.py
metaworld/envs/mujoco/sawyer_xyz/sawyer_plate_slide_back_side.py
metaworld/envs/mujoco/sawyer_xyz/sawyer_plate_slide_side.py
metaworld/envs/mujoco/sawyer_xyz/sawyer_push_back.py
metaworld/envs/mujoco/sawyer_xyz/sawyer_reach_push_pick_place.py
metaworld/envs/mujoco/sawyer_xyz/sawyer_reach_push_pick_place_wall.py
metaworld/envs/mujoco/sawyer_xyz/sawyer_shelf_place.py
metaworld/envs/mujoco/sawyer_xyz/sawyer_shelf_remove.py
metaworld/envs/mujoco/sawyer_xyz/sawyer_soccer.py
metaworld/envs/mujoco/sawyer_xyz/sawyer_stick_pull.py
metaworld/envs/mujoco/sawyer_xyz/sawyer_stick_push.py
metaworld/envs/mujoco/sawyer_xyz/sawyer_sweep.py
metaworld/envs/mujoco/sawyer_xyz/sawyer_sweep_into_goal.py
metaworld/envs/mujoco/sawyer_xyz/sawyer_sweep_tool.py
metaworld/envs/mujoco/sawyer_xyz/sawyer_window_close.py
metaworld/envs/mujoco/sawyer_xyz/sawyer_window_open.py
metaworld/envs/mujoco/utils/__init__.py
metaworld/envs/mujoco/utils/combine_xmls.py
metaworld/envs/mujoco/utils/create_xml.py
metaworld/envs/mujoco/utils/interpolation.py
metaworld/envs/mujoco/utils/inverse_kinematics.py
metaworld/envs/mujoco/utils/rotation.py
tests/__init__.py
tests/helpers.py
tests/integration/__init__.py
tests/integration/test_memory_usage.py
tests/metaworld/__init__.py
tests/metaworld/benchmarks/__init__.py
tests/metaworld/benchmarks/test_ml1_random_init.py
tests/metaworld/envs/__init__.py
tests/metaworld/envs/test_multitask_env.py
tests/metaworld/envs/test_quat.py
tests/metaworld/envs/mujoco/__init__.py
tests/metaworld/envs/mujoco/sawyer_xyz/__init__.py
tests/metaworld/envs/mujoco/sawyer_xyz/test_init_config.py
tests/metaworld/envs/mujoco/sawyer_xyz/test_sawyer_parameterized.py
