# Supplementary material
Source: ML conference proceedings conference paper supplement (https://proceedings.mlr.press/v139/xie21c.html)
Supplement: Supplementary file 2 [file xie21c-supp.zip › supplement/code/metaworld/metaworld/benchmarks/__init__.py]

from metaworld.benchmarks.ml1 import ML1
from metaworld.benchmarks.ml10 import ML10
from metaworld.benchmarks.ml45 import ML45
from metaworld.benchmarks.mt10 import MT10
from metaworld.benchmarks.mt50 import MT50


__all__ = ['ML1', 'ML10', 'ML45', 'MT10', 'MT50']
