# Supplementary material
Source: ML conference proceedings conference paper supplement (https://proceedings.mlr.press/v139/xie21c.html)
Supplement: Supplementary file 2 [file xie21c-supp.zip › supplement/code/metaworld/metaworld/benchmarks/base.py]

class Benchmark:

    @classmethod
    def get_train_tasks(cls, sample_all=False):
        return cls(env_type='train', sample_all=sample_all)
    
    @classmethod
    def get_test_tasks(cls, sample_all=False):
        return cls(env_type='test', sample_all=sample_all)
