# Supplementary material
Source: ML conference proceedings conference paper supplement (https://proceedings.mlr.press/v139/xie21c.html)
Supplement: Supplementary file 2 [file xie21c-supp.zip › supplement/code/metaworld/metaworld/benchmarks/ml10.py]

from metaworld.benchmarks.base import Benchmark
from metaworld.core.serializable import Serializable
from metaworld.envs.mujoco.multitask_env import MultiClassMultiTaskEnv
from metaworld.envs.mujoco.env_dict import MEDIUM_MODE_ARGS_KWARGS, MEDIUM_MODE_CLS_DICT


class ML10(MultiClassMultiTaskEnv, Benchmark, Serializable):

    def __init__(self, env_type='train', sample_all=False):
        assert env_type == 'train' or env_type == 'test'
        Serializable.quick_init(self, locals())

        cls_dict = MEDIUM_MODE_CLS_DICT[env_type]
        args_kwargs = MEDIUM_MODE_ARGS_KWARGS[env_type]

        super().__init__(
            task_env_cls_dict=cls_dict,
            task_args_kwargs=args_kwargs,
            sample_goals=True,
            obs_type='plain',
            sample_all=sample_all)
