# Supplementary material
Source: ML conference proceedings conference paper supplement (https://proceedings.mlr.press/v139/xie21c.html)
Supplement: Supplementary file 2 [file xie21c-supp.zip › supplement/code/metaworld/metaworld/core/flat_goal_env.py]

from gym.spaces import Box, Dict
import numpy as np

from metaworld.core.wrapper_env import ProxyEnv


class FlatGoalEnv(ProxyEnv):
    def __init__(
            self,
            wrapped_env,
            obs_keys=None,
            goal_keys=None,
            append_goal_to_obs=False,
    ):
        self.quick_init(locals())
        super(FlatGoalEnv, self).__init__(wrapped_env)

        if obs_keys is None:
            obs_keys = ['observation']
        if goal_keys is None:
            goal_keys = ['desired_goal']
        if append_goal_to_obs:
            obs_keys += goal_keys
        for k in obs_keys:
            assert k in self.wrapped_env.observation_space.spaces
        for k in goal_keys:
            assert k in self.wrapped_env.observation_space.spaces
        assert isinstance(self.wrapped_env.observation_space, Dict)

        self.obs_keys = obs_keys
        self.goal_keys = goal_keys
        # TODO: handle nested dict
        self.observation_space = Box(
            np.hstack([
                self.wrapped_env.observation_space.spaces[k].low
                for k in obs_keys
            ]),
            np.hstack([
                self.wrapped_env.observation_space.spaces[k].high
                for k in obs_keys
            ]),
        )
        self.goal_space = Box(
            np.hstack([
                self.wrapped_env.observation_space.spaces[k].low
                for k in goal_keys
            ]),
            np.hstack([
                self.wrapped_env.observation_space.spaces[k].high
                for k in goal_keys
            ]),
        )
        self._goal = None

    def step(self, action):
        obs, reward, done, info = self.wrapped_env.step(action)
        flat_obs = np.hstack([obs[k] for k in self.obs_keys])
        return flat_obs, reward, done, info

    def reset(self):
        obs = self.wrapped_env.reset()
        self._goal = np.hstack([obs[k] for k in self.goal_keys])
        return np.hstack([obs[k] for k in self.obs_keys])

    def get_goal(self):
        return self._goal
