# Supplementary material
Source: ML conference proceedings conference paper supplement (https://proceedings.mlr.press/v139/xie21c.html)
Supplement: Supplementary file 2 [file xie21c-supp.zip › supplement/code/metaworld/metaworld/core/wrapper_env.py]

from gym.spaces import Box

from metaworld.core.serializable import Serializable
import numpy as np

class ProxyEnv(Serializable):
    def __init__(self, wrapped_env):
        self.quick_init(locals())
        self._wrapped_env = wrapped_env

    @property
    def wrapped_env(self):
        return self._wrapped_env

    def __getattr__(self, attrname):
        if attrname == '_serializable_initialized':
            return None
        return getattr(self._wrapped_env, attrname)

    def __str__(self):
        return '{}({})'.format(type(self).__name__, self.wrapped_env)


class NormalizedBoxEnv(ProxyEnv, Serializable):
    """
    Normalize action to in [-1, 1].

    Optionally normalize observations.
    """
    def __init__(
            self,
            env,
            obs_means=None,
            obs_stds=None,
            obs_to_normalize_keys=['observation'],
    ):
        # self._wrapped_env needs to be called first because
        # Serializable.quick_init calls getattr, on this class. And the
        # implementation of getattr (see below) calls self._wrapped_env.
        # Without setting this first, the call to self._wrapped_env would call
        # getattr again (since it's not set yet) and therefore loop forever.
        # Or else serialization gets delegated to the wrapped_env. Serialize
        # this env separately from the wrapped_env.
        self._wrapped_env = env
        Serializable.quick_init(self, locals())
        ProxyEnv.__init__(self, env)
        self._should_normalize = not (obs_means is None and obs_stds is None)
        num_obs_types = len(obs_to_normalize_keys)
        if self._should_normalize:
            if obs_means is None:
                obs_means = dict()
                for key in self.obs_to_normalize_keys:
                    obs_means[key] = np.zeros_like(env.observation_space[key].low)
            else:
                obs_means = dict()
                for key in self.obs_to_normalize_keys:
                    obs_means[key] = np.array(obs_means[key])
            if obs_stds is None:
                obs_stds = dict()
                for key in self.obs_to_normalize_keys:
                    obs_stds[key] = np.zeros_like(env.observation_space[key].low)
            else:
                obs_stds = dict()
                for key in self.obs_to_normalize_keys:
                    obs_stds[key] = np.array(obs_stds[key])
        self._obs_means = obs_means
        self._obs_stds = obs_stds
        ub = np.ones(self._wrapped_env.action_space.shape)
        self.action_space = Box(-1 * ub, ub)
        self.obs_to_normalize_keys=obs_to_normalize_keys

    def estimate_obs_stats(self, obs_batch, override_values=False):
        raise NotImplementedError()

    def _apply_normalize_obs(self, obs):
        for key in self.obs_to_normalize_keys:
            obs[key]= (obs[key] - self._obs_means[key]) / (self._obs_stds[key] + 1e-8)

    def __getstate__(self):
        d = Serializable.__getstate__(self)
        # Add these explicitly in case they were modified
        d["_obs_means"] = self._obs_means
        d["_obs_stds"] = self._obs_stds
        return d

    def __setstate__(self, d):
        Serializable.__setstate__(self, d)
        self._obs_means = d["_obs_means"]
        self._obs_stds = d["_obs_stds"]

    def step(self, action):
        lb = self._wrapped_env.action_space.low
        ub = self._wrapped_env.action_space.high
        scaled_action = lb + (action + 1.) * 0.5 * (ub - lb)
        scaled_action = np.clip(scaled_action, lb, ub)
        wrapped_step = self._wrapped_env.step(scaled_action)
        next_obs, reward, done, info = wrapped_step
        if self._should_normalize:
            next_obs = self._apply_normalize_obs(next_obs)
        return next_obs, reward, done, info

    def __str__(self):
        return "Normalized: %s" % self._wrapped_env
