# Supplementary material
Source: ML conference proceedings conference paper supplement (https://proceedings.mlr.press/v139/xie21c.html)
Supplement: Supplementary file 2 [file xie21c-supp.zip › supplement/code/metaworld/metaworld/envs/env_util.py]

import os

from collections import OrderedDict
from numbers import Number

import numpy as np
from gym.spaces import Box
import mujoco_py

import metaworld.envs.mujoco.utils.rotation as mjrot

ENV_ASSET_DIR = os.path.join(os.path.dirname(__file__), 'assets')


def create_stats_ordered_dict(
        name,
        data,
        stat_prefix=None,
        always_show_all_stats=True,
        exclude_max_min=False,
):
    if stat_prefix is not None:
        name = "{} {}".format(stat_prefix, name)
    if isinstance(data, Number):
        return OrderedDict({name: data})

    if len(data) == 0:
        return OrderedDict()

    if isinstance(data, tuple):
        ordered_dict = OrderedDict()
        for number, d in enumerate(data):
            sub_dict = create_stats_ordered_dict(
                "{0}_{1}".format(name, number),
                d,
            )
            ordered_dict.update(sub_dict)
        return ordered_dict

    if isinstance(data, list):
        try:
            iter(data[0])
        except TypeError:
            pass
        else:
            data = np.concatenate(data)

    if (isinstance(data, np.ndarray) and data.size == 1
            and not always_show_all_stats):
        return OrderedDict({name: float(data)})

    stats = OrderedDict([
        (name + ' Mean', np.mean(data)),
        (name + ' Std', np.std(data)),
    ])
    if not exclude_max_min:
        stats[name + ' Max'] = np.max(data)
        stats[name + ' Min'] = np.min(data)
    return stats


def get_generic_path_information(paths, stat_prefix=''):
    """
    Get an OrderedDict with a bunch of statistic names and values.
    """
    statistics = OrderedDict()
    returns = [sum(path["rewards"]) for path in paths]

    rewards = np.vstack([path["rewards"] for path in paths])
    statistics.update(create_stats_ordered_dict('Rewards', rewards,
                                                stat_prefix=stat_prefix))
    statistics.update(create_stats_ordered_dict('Returns', returns,
                                                stat_prefix=stat_prefix))
    actions = [path["actions"] for path in paths]
    if len(actions[0].shape) == 1:
        actions = np.hstack([path["actions"] for path in paths])
    else:
        actions = np.vstack([path["actions"] for path in paths])
    statistics.update(create_stats_ordered_dict(
        'Actions', actions, stat_prefix=stat_prefix
    ))
    statistics['Num Paths'] = len(paths)

    return statistics


def get_average_returns(paths):
    returns = [sum(path["rewards"]) for path in paths]
    return np.mean(returns)


def get_path_lengths(paths):
    return [len(path['observations']) for path in paths]


def get_stat_in_paths(paths, dict_name, scalar_name):
    if len(paths) == 0:
        return np.array([[]])

    if type(paths[0][dict_name]) == dict:
        # Support rllab interface
        return [path[dict_name][scalar_name] for path in paths]

    return [
        [info[scalar_name] for info in path[dict_name]]
        for path in paths
    ]


def get_asset_full_path(file_name):
    return os.path.join(ENV_ASSET_DIR, file_name)

def concatenate_box_spaces(*spaces):
    """
    Assumes dtypes of all spaces are the of the same type
    """
    low = np.concatenate([space.low for space in spaces])
    high = np.concatenate([space.high for space in spaces])
    return Box(low=low, high=high, dtype=np.float32)

def quat_to_zangle(quat):
    q = quat_mul(quat_inv(quat_create(np.array([0,1.,0]), np.pi/2)), quat)
    ax,angle = mjrot.quat2axisangle(q)    
    return angle
    
def zangle_to_quat(zangle):
    """
    :param zangle in rad
    :return: quaternion
    """
    return quat_mul(quat_create(np.array([0, 1., 0]), np.pi/2),
                    quat_create(np.array([-1., 0, 0]), zangle))

def quat_create(axis, angle):
    """
        Create a quaternion from an axis and angle.
        :param axis The three dimensional axis
        :param angle The angle in radians
        :return: A 4-d array containing the components of a quaternion.
    """
    quat = np.zeros([4], dtype='float') 
    mujoco_py.functions.mju_axisAngle2Quat(quat, axis, angle)
    return quat

def quat_inv(quat):
    """
        Invert a quaternion, represented by a 4d array.
        :param A quaternion (4-d array). Must not be the zero quaternion (all elements equal to zero)
        :return: A 4-d array containing the components of a quaternion.
    """
    d = 1. / np.sum(quat**2)
    return d * np.array([1., -1., -1., -1.]) * quat

def quat_mul(quat1, quat2):
    """
        Multiply two quaternions, both represented as 4-d arrays.
    """
    prod_quat = np.zeros([4], dtype='float')
    mujoco_py.functions.mju_mulQuat(prod_quat, quat1, quat2)
    return prod_quat
