# Supplementary material
Source: ML conference proceedings conference paper supplement (https://proceedings.mlr.press/v139/xie21c.html)
Supplement: Supplementary file 2 [file xie21c-supp.zip › supplement/code/metaworld/scripts/keyboard_control.py]

"""
Use this script to control the env with your keyboard.
For this script to work, you need to have the PyGame window in focus.

See/modify `char_to_action` to set the key-to-action mapping.
"""
import sys
import gym

import numpy as np

from metaworld.envs.mujoco.sawyer_xyz.sawyer_door_hook import SawyerDoorHookEnv
from metaworld.envs.mujoco.sawyer_xyz.sawyer_door import SawyerDoorEnv

from metaworld.envs.mujoco.sawyer_xyz.sawyer_pick_and_place import \
    SawyerPickAndPlaceEnv
from metaworld.envs.mujoco.sawyer_xyz.sawyer_push_and_reach_env import \
    SawyerPushAndReachXYEnv, SawyerPushAndReachXYZEnv
from metaworld.envs.mujoco.sawyer_xyz.sawyer_push_and_reach_env_two_pucks import (
    SawyerPushAndReachXYDoublePuckEnv,
    SawyerPushAndReachXYZDoublePuckEnv,
)

from metaworld.envs.mujoco.sawyer_xyz.sawyer_reach import SawyerReachXYEnv, \
    SawyerReachXYZEnv

from metaworld.envs.mujoco.sawyer_xyz.sawyer_throw import SawyerThrowEnv
from metaworld.envs.mujoco.sawyer_xyz.sawyer_hand_insert import SawyerHandInsertEnv
from metaworld.envs.mujoco.sawyer_xyz.sawyer_sweep_into_goal import SawyerSweepIntoGoalEnv


import pygame
from pygame.locals import QUIT, KEYDOWN

pygame.init()
screen = pygame.display.set_mode((400, 300))


char_to_action = {
    'w': np.array([0, -1, 0, 0]),
    'a': np.array([1, 0, 0, 0]),
    's': np.array([0, 1, 0, 0]),
    'd': np.array([-1, 0, 0, 0]),
    'q': np.array([1, -1, 0, 0]),
    'e': np.array([-1, -1, 0, 0]),
    'z': np.array([1, 1, 0, 0]),
    'c': np.array([-1, 1, 0, 0]),
    'k': np.array([0, 0, 1, 0]),
    'j': np.array([0, 0, -1, 0]),
    'h': 'close',
    'l': 'open',
    'x': 'toggle',
    'r': 'reset',
    'p': 'put obj in hand',
}


import gym
import metaworld
import pygame
# env = gym.make('SawyerPushAndReachEnvEasy-v0')
# env = SawyerPushAndReachXYEnv(
#     goal_low=(-0.15, 0.4, 0.02, -.1, .5),
#     goal_high=(0.15, 0.75, 0.02, .1, .7),
#     puck_low=(-.3, .25),
#     puck_high=(.3, .9),
#     hand_low=(-0.15, 0.4, 0.05),
#     hand_high=(0.15, .75, 0.3),
#     norm_order=2,
#     xml_path='sawyer_xyz/sawyer_push_puck_small_arena.xml',
#     reward_type='state_distance',
#     reset_free=False,
# )
# env = SawyerSweepEnv()
# env = SawyerSweepIntoGoalEnv()
env = SawyerBoxCloseEnv(random_init=True)
NDIM = env.action_space.low.size
lock_action = False
random_action = False
obs = env.reset()
action = np.zeros(4)
while True:
    done = False
    if not lock_action:
        action[:3] = 0
    if not random_action:
        for event in pygame.event.get():
            event_happened = True
            if event.type == QUIT:
                sys.exit()
            if event.type == KEYDOWN:
                char = event.dict['key']
                new_action = char_to_action.get(chr(char), None)
                if new_action == 'toggle':
                    lock_action = not lock_action
                elif new_action == 'reset':
                    done = True
                elif new_action == 'close':
                    action[3] = 1
                elif new_action == 'open':
                    action[3] = -1
                elif new_action == 'put obj in hand':
                    print("putting obj in hand")
                    env.put_obj_in_hand()
                    action[3] = 1
                elif new_action is not None:
                    action[:3] = new_action[:3]
                else:
                    action = np.zeros(3)
                print(action)
    else:
        action = env.action_space.sample()
    ob, reward, done, infos = env.step(action)
    # time.sleep(1)
    if done:
        obs = env.reset()
    env.render()
