# Supplementary material
Source: ML conference proceedings conference paper supplement (https://proceedings.mlr.press/v139/xie21c.html)
Supplement: Supplementary file 2 [file xie21c-supp.zip › supplement/code/metaworld/setup.py]

from setuptools import find_packages, setup


# Required dependencies
required = [
    # Please keep alphabetized
    'mujoco-py<2.1,>=2.0',
    'opencv-python>=4.1.0.25',
]


# Development dependencies
extras = dict()
extras['dev'] = [
    # Please keep alphabetized
    'ipdb',
    'memory_profiler',
    'pylint',
    'pyquaternion==0.9.5',
    'pytest>=3.6',
]


setup(
    name='metaworld',
    packages=find_packages(),
    include_package_data=True,
    install_requires=required,
    extras_require=extras,
)
