# Supplementary material
Source: ML conference proceedings conference paper supplement (https://proceedings.mlr.press/v139/xie21c.html)
Supplement: Supplementary file 2 [file xie21c-supp.zip › supplement/code/scripts/run_hc_vel.sh]

softlearning run_example_local examples.development --universe=gym --domain=HalfCheetah-Vel --task=v3 --exp-name=lilac
