# Supplementary material
Source: ML conference proceedings conference paper supplement (https://proceedings.mlr.press/v139/xie21c.html)
Supplement: Supplementary file 2 [file xie21c-supp.zip › supplement/code/scripts/run_minitaur.sh]

softlearning run_example_local examples.development --universe=gym --domain=MinitaurGoalVelEnv --task=Default-v0 --exp-name=lilac
