# Supplementary material
Source: ML conference proceedings conference paper supplement (https://proceedings.mlr.press/v139/xie21c.html)
Supplement: Supplementary file 2 [file xie21c-supp.zip › supplement/code/softlearning/config/ray-autoscaler-ec2.yaml]

# An unique identifier for the head node and workers of this cluster.
cluster_name: softlearning

# The minimum number of workers nodes to launch in addition to the head
# node. This number should be >= 0.
min_workers: 0

# The maximum number of workers nodes to launch in addition to the head
# node. This takes precedence over min_workers.
max_workers: 5

# The initial number of worker nodes to launch in addition to the head
# node. When the cluster is first brought up (or when it is refreshed with a
# subsequent `ray up`) this number of nodes will be started.
initial_workers: 0

# This executes all commands on all nodes in the docker container,
# and opens all the necessary ports to support the Ray cluster.
# Empty string means disabled.
docker:
    image: ""
    container_name: "" # e.g. ray_docker
    # container_name: "sac-ray-mujoco"

# The autoscaler will scale up the cluster to this target fraction of resource
# usage. For example, if a cluster of 10 nodes is 100% busy and
# target_utilization is 0.8, it would resize the cluster to 13. This fraction
# can be decreased to increase the aggressiveness of upscaling.
# This value must be less than 1.0 for scaling to happen.
target_utilization_fraction: 0.8

# If a node is idle for this many minutes, it will be removed.
idle_timeout_minutes: 5

# Cloud-provider specific configuration.
provider:
    type: aws
    region: us-west-2
    availability_zone: us-west-2a

# How Ray will authenticate with newly launched nodes.
auth:
    ssh_user: ubuntu
# By default Ray creates a new private keypair, but you can also use your own.
# If you do so, make sure to also set "KeyName" in the head and worker node
# configurations below.
#    ssh_private_key: /path/to/your/key.pem

# Provider-specific config for the head node, e.g. instance type. By default
# Ray will auto-configure unspecified fields such as SubnetId and KeyName.
# For more documentation on available fields, see:
# http://boto3.readthedocs.io/en/latest/reference/services/ec2.html#EC2.ServiceResource.create_instances
head_node:
    InstanceType: m4.xlarge
    ImageId: <TODO:AMI>

    # # You can provision additional disk space with a conf as follows
    # BlockDeviceMappings:
    #     - DeviceName: /dev/sda1
    #       Ebs:
    #           VolumeSize: 50

    # Additional options in the boto docs.

# Provider-specific config for worker nodes, e.g. instance type. By default
# Ray will auto-configure unspecified fields such as SubnetId and KeyName.
# For more documentation on available fields, see:
# http://boto3.readthedocs.io/en/latest/reference/services/ec2.html#EC2.ServiceResource.create_instances
worker_nodes:
    InstanceType: m4.2xlarge
    # InstanceType: t2.micro
    ImageId: <TODO:AMI>

    # Run workers on spot by default. Comment this out to use on-demand.
    InstanceMarketOptions:
        MarketType: spot
        # Additional options can be found in the boto docs, e.g.
        # SpotOptions:
        #     MaxPrice: 0.5

    # Additional options in the boto docs.

# Files or directories to copy to the head and worker nodes. The format is a
# dictionary from REMOTE_PATH: LOCAL_PATH, e.g.
file_mounts: {
    "/tmp/current_git_HEAD": "<TODO>/.git/HEAD",
    "~/.mujoco/mjkey.txt": "~/.mujoco/mjkey.txt",
}

# List of shell commands to run to set up nodes.
setup_commands:
    - >-
        (test -e softlearning
        || git clone git@github.com:haarnoja/softlearning.git)
        && cd ~/softlearning
        && git fetch --all
        && git_HEAD=`cat /tmp/current_git_HEAD | cut -d \  -f 2`
        && git checkout ${git_HEAD#"refs/heads/"}

# Custom commands that will be run on the head node after common setup.
head_setup_commands: []

# Custom commands that will be run on worker nodes after common setup.
worker_setup_commands: []

# Command to start ray on the head node. You don't need to change this.
head_start_ray_commands:
    - ray stop
    - >-
        ray start
        --head
        --redis-port=6379
        --object-manager-port=8076
        --autoscaling-config=~/ray_bootstrap_config.yaml

# Command to start ray on worker nodes. You don't need to change this.
worker_start_ray_commands:
    - ray stop
    - >-
        ray start
        --redis-address=$RAY_HEAD_IP:6379
        --object-manager-port=8076
