# Supplementary material
Source: ML conference proceedings conference paper supplement (https://proceedings.mlr.press/v139/xie21c.html)
Supplement: Supplementary file 2 [file xie21c-supp.zip › supplement/code/softlearning/docker/cloudbuild.yaml]

# https://cloud.google.com/cloud-build/docs/build-config
steps:

# 1. Build gpu image
# Build image with docker-compose
- name: 'docker/compose:1.24.0'
  args:
    - '-f'
    - '/workspace/docker/docker-compose.dev.gpu.yml'
    - 'build'
    - '--force-rm'
    - '--parallel'
  secretEnv:
    - MJKEY
  env:
    - 'IMAGE_NAME=${REPO_NAME}'
    - 'IMAGE_TAG=${SHORT_SHA}'

# 2. Retag the gpu image into a gce repository.
- name: 'gcr.io/cloud-builders/docker'
  args:
    - 'tag'
    - '${REPO_NAME}:${SHORT_SHA}-gpu'
    - 'gcr.io/${PROJECT_ID}/${REPO_NAME}:${SHORT_SHA}-gpu'

- name: 'gcr.io/cloud-builders/docker'
  args:
    - 'tag'
    - '${REPO_NAME}:${SHORT_SHA}-gpu'
    - 'gcr.io/${PROJECT_ID}/${REPO_NAME}:latest-gpu'


# 1. Build cpu image
- name: 'docker/compose:1.24.0'
  args:
    - '-f'
    - '/workspace/docker/docker-compose.dev.cpu.yml'
    - 'build'
    - '--force-rm'
    - '--parallel'
  secretEnv:
    - MJKEY
  env:
    - 'IMAGE_NAME=${REPO_NAME}'
    - 'IMAGE_TAG=${SHORT_SHA}'

# 2. Retag the cpu image into a gce repository.
- name: 'gcr.io/cloud-builders/docker'
  args:
    - 'tag'
    - '${REPO_NAME}:${SHORT_SHA}-cpu'
    - 'gcr.io/${PROJECT_ID}/${REPO_NAME}:${SHORT_SHA}-cpu'

- name: 'gcr.io/cloud-builders/docker'
  args:
    - 'tag'
    - '${REPO_NAME}:${SHORT_SHA}-cpu'
    - 'gcr.io/${PROJECT_ID}/${REPO_NAME}:latest-cpu'


options:
    substitution_option: 'ALLOW_LOOSE'
secrets:
- kmsKeyName: projects/tuomas-softlearning/locations/global/keyRings/softlearning-ring/cryptoKeys/softlearning-test
  secretEnv:
    MJKEY: |
      CiQAAis3HkqhleV++GZn2GvPx8fsw7lGNoPscpAqqdhMA8T64ZgS7wcAsW+D72srQXBnF3Gxpn/D
      WVPtYTiehuCCC+Knnl9MqU/X4/8b1TIqYzPfZMZmP85b4gzWZJ4LPYJVVZbjzZI3vSn8OB0ejXa3
      5AK+NIjonhq/6/f6CeXJxlEXj8OL7PwFFe09yMjmpvcJPsvgJrGseKuZU/Bbl4iR3DTtNqA/0eId
      YhPmuq3XL4MCnVQ+OKNFfQZtCHEVXNvtBjZ0j0U6/pQMEOmhbOzp/zMEYeMH4/P553bF3m3L7Qi5
      Zt8lIVqIHs4mI9VBKQ2CRlUzIh5+Y8Luk5csErHM9ilg6dViEJAA3+cEijd92x3Df2/NevQdN7FB
      c74obb5u87V6GRjYor0HJujH9RJNcFXKs5Wi9x1/8Fw4fNH2fDBEAdOjDsSlL9zF/b6+9D3ncvan
      aWhtzNjr14coi9Ay9LoSJZRaCLUIB1VG6w5deQMpKuEs9b54u9UkwgMys5H9sEEnsuc6IQR1Prnz
      7xQN7I8XfiSYwg3xoWgHMNHrcyZ/FLNXhP3j51L1AboSaNfe1SPrtiJie2pjrcaLMNI7iWbUkLgs
      JFvszGbbDTFTw6RA+U+uz6S4EnioFJJHHxsM0nB7CU7JC81PQ2m1lKdaKWMcZ5qsIyj7iFZjQWn0
      b1LMuPD0xdOt2FQ7BPlX8uE9Qrc3xJRFgscW0O0I1880OrjFaLQlosQjE/Sz43VaBE/xTsnRWAxT
      gVK3wK0pok5oiLxwbvXII0T/tv5lQdOxAcbKhEMXSWLZv86tQaOKW6rFPrL2MY2yEOcE3bk1oHzX
      vutfuCxdWKz42IPWFEhs69NxgxT1iBLRqR9KjKiTYnnXdTjOxJ0i/M1Q8PoMTB6QwXsyrYwDjsR7
      yK8jmKNuFmi4N535bOLg2z+wN4ClHdwlJODrcBFBCI0Xbykd/KBlX+VuStd/E6NOuAEgl3XqBPNw
      baHVo9OAyhLFNxGc9mrX3uKywzwEfkiDi0Zo0KLN4hi7J19kGvuKja22sm9aMpmeZKFMEP7bMc/3
      YwGvLAMPmGKhDbmFDOkyKwy/RPifVHomCJ0U8s29PSHxjTmukooYLsVHe1OVbkz44Xo68xQ6afLz
      LBVLfEIcWClbmDNYxDrCUQXnrZyGHpeNG3rCzqTX6a7ZUDh0locX9f+JphggJrcV05zBNiXeQ+XZ
      lxuAI0cnx4euiHZb6MRXA3H6TlS9PIEF4n7eLuIC827w55qMRmJmEY59mZ/1xqs8buln087mcz4b
      HIG5KpRwrSC80JHVpdiXrxupOjvknSWmvMo34dmNZvazcVkcWqT8otjwV8FDU7kTlIe+pXbV9YQx
      eBMtntxk93yy9vM7RHvMccGObx/iaQ==


# logsBucket: 'gs://<bucket-name>'
images:
  - 'gcr.io/${PROJECT_ID}/${REPO_NAME}:latest-gpu'
  - 'gcr.io/${PROJECT_ID}/${REPO_NAME}:latest-cpu'
  - 'gcr.io/${PROJECT_ID}/${REPO_NAME}:${SHORT_SHA}-gpu'
  - 'gcr.io/${PROJECT_ID}/${REPO_NAME}:${SHORT_SHA}-cpu'
