# Supplementary material
Source: ML conference proceedings conference paper supplement (https://proceedings.mlr.press/v139/xie21c.html)
Supplement: Supplementary file 2 [file xie21c-supp.zip › supplement/code/softlearning/docker/docker-compose.cloud.yml]

# WIP

# Docker compose file that builds images and runs the containers needed for
# running softlearning on cloud (e.g. with ray). You need to have your
# MJKEY set in the environment.
#
# docker-compose \
#     -f ./docker/docker-compose.dev.yml \
#     build \
#         --build-arg MJKEY="$(cat ~/.mujoco/mjkey.txt)"

version: "3"
services:
  softlearning-dev:
    image: softlearning-dev-compose-test
    build:
      context: ../.
      dockerfile: docker/Dockerfile.softlearning.base.gpu
      args:
        - MJKEY
    ports:
      - "6006-6016"  # Tensorboard
      - "5000-5010"  # Viskit
      - "8888-8898"  # Jupyter
    volumes:
       - ~/.aws:/root/.aws  # If using aws, e.g. for s3
       - ~/.config/gcloud:/root/.config/gcloud  # If using gcp, e.g. for gs
       - ~/.mujoco:/root/.mujoco  # mjkey.txt
       - ..:/root/softlearning-private
