# Supplementary material
Source: ML conference proceedings conference paper supplement (https://proceedings.mlr.press/v139/xie21c.html)
Supplement: Supplementary file 2 [file xie21c-supp.zip › supplement/code/softlearning/environment.yml]

name: softlearning_lilac
channels:
- defaults
- conda-forge
dependencies:
- python=3.7.3
- pip>=19.1
- conda>=4.6
- patchelf=0.9  # only works on Linux; comment this line out on Mac
- pyopengl-accelerate==3.1.3b1
- pip:
    - -r ./requirements.txt
