# Supplementary material
Source: ML conference proceedings conference paper supplement (https://proceedings.mlr.press/v139/xie21c.html)
Supplement: Supplementary file 2 [file xie21c-supp.zip › supplement/code/softlearning/examples/multi_goal/__init__.py]

"""Provides functions that are utilized by the command line interface.

In particular, the examples are exposed to the command line interface
(defined in `softlearning.scripts.console_scripts`) through the
`get_trainable_class`, `get_variant_spec`, and `get_parser` functions.
"""


def get_trainable_class(*args, **kwargs):
    from .main import run_experiment
    return run_experiment


def get_variant_spec(command_line_args, *args, **kwargs):
    from .variants import get_variant_spec
    variant_spec = get_variant_spec(command_line_args, *args, **kwargs)
    return variant_spec


def get_parser():
    from examples.utils import get_parser
    parser = get_parser()

    for dest, value in (('universe', 'gym'),
                        ('task', 'MultiGoal'),
                        ('domain', 'Default-v0')):
        option = next(x for x in parser._actions if x.dest == dest)
        option.default = value
        option.choices = {value}

    return parser
