# Supplementary material
Source: ML conference proceedings conference paper supplement (https://proceedings.mlr.press/v139/xie21c.html)
Supplement: Supplementary file 2 [file xie21c-supp.zip › supplement/code/softlearning/models/pusher_2d.xml]

<mujoco model="arm3d">
    <compiler inertiafromgeom="true" angle="radian" coordinate="local" />
    <custom>
        <numeric name="frame_skip" data="5" />
    </custom>
    <option timestep="0.01" gravity="0 0 0" iterations="20" integrator="Euler" />

    <asset>
      <texture name="texplane" type="2d" builtin="flat" rgb1="0 0 0" rgb2="0.8 0.8 0.8" width="5" height="5" />
      <material name='MatPlane' texture="texplane" shininess="0" texrepeat="60 60" specular="0"  reflectance="0" />
    </asset>

    <default>
        <joint armature='0.04' damping="1" limited="true"/>
        <geom friction=".8 .1 .1" density="300" margin="0.002" condim="1" contype="1" conaffinity="1"/>
    </default>

    <worldbody>
        <light diffuse=".5 .5 .5" pos="0 0 5" dir="0 0 -1"/>
        <geom name="floor" rgba="0 0 0 1" type="plane" material="MatPlane" pos="0 0.5 -0.15" size="4 4 0.1" contype="1" conaffinity="1"/>

        <body name="palm" pos="0 0 0">
            <geom rgba="0. 1. 0. 1" type="capsule" fromto="0 0 -0.1 0 0 0.1" size="0.12"/>
            <body name="proximal_1" pos="0 0 -0.075" axisangle="0 0 1 0.785">
                <joint name="proximal_j_1" type="hinge" pos="0 0 0" axis="0 0 1" range="-2.5 2.5" damping="1.0" />
                <geom rgba="0. 1. 0. 1" type="capsule"  fromto="0 0 0 0.4 0 0" size="0.06" contype="1" conaffinity="1"/>
                <body name="distal_1" pos="0.4 0 0" axisangle="0 0 1 -0.785">
                    <joint name="distal_j_1" type="hinge" pos="0 0 0" axis="0 0 1" range="-2.3213 2.3" damping="1.0"/>
                    <geom rgba="0. 1. 0. 1" type="capsule"  fromto="0 0 0 0.4 0 0" size="0.06" contype="1" conaffinity="1"/>
                    <body name="distal_2" pos="0.4 0 0" axisangle="0 0 1 -1.57">
                        <joint name="distal_j_2" type="hinge" pos="0 0 0" axis="0 0 1" range="-2.3213 2.3" damping="1.0"/>
                        <geom rgba="0. 1. 0. 1" type="capsule" fromto="0 0 0 0.4 0 0" size="0.06" contype="1" conaffinity="1"/>
                        <body name="distal_4" pos="0.4 0 0">
                            <site name="tip arml" pos="0.1 -0.2 0" size="0.01" />
                            <site name="tip armr" pos="0.1 0.2 0" size="0.01" />
                            <!--<joint name="distal_j_3" type="hinge" pos="0 0 0" axis="1 0 0" range="-3.3213 3.3" damping="0.5"/>-->
                            <geom rgba="0. 1. 0. 1" type="capsule" fromto="0 -0.2 0 0 0.2 0" size="0.04" contype="1" conaffinity="1" />
                            <geom rgba="0. 1. 0. 1" type="capsule" fromto="0 -0.2 0 0.2 -0.2 0" size="0.04" contype="1" conaffinity="1" />
                            <geom rgba="0. 1. 0. 1" type="capsule" fromto="0 0.2 0 0.2 0.2 0" size="0.04" contype="1" conaffinity="1" />
                        </body>
                    </body>
                </body>
            </body>
        </body>

        <body name="object" pos="0 0 -0.1">
            <!--<geom rgba="1. 1. 1. 1" type="box" size="0.05 0.05 0.05" density='0.00001' contype="1" conaffinity="1"/>-->
            <geom rgba="1. 1. 1. 1" type="cylinder" size="0.1 0.1 0.1" density='0.00001' contype="1" conaffinity="1"/>
            <joint name="obj_slidex" type="slide" pos="0.025 0.025 0.025" axis="1 0 0" range="-10.3213 10.3" damping="0.5"/>
            <joint name="obj_slidey" type="slide" pos="0.025 0.025 0.025" axis="0 1 0" range="-10.3213 10.3" damping="0.5"/>
        </body>

        <body name="goal" pos="0 -1 -0.145">
            <!--<body name="goal" pos="0.0 0.0 -0.1">-->
            <!--<geom rgba="1. 0. 0. 1" type="box" size="0.1 0.1 0.1" density='0.00001' contype="0" conaffinity="0"/>-->
            <geom rgba="1. 0. 0. 1" type="cylinder" size="0.17 0.005 0.2" density='0.00001' contype="0" conaffinity="0"/>
            <!-- <geom rgba="1. 0. 0. 1" type="box" size="0.1 0.1 0.2" density='0.00001' contype="0" conaffinity="0"/>-->
            <joint name="goal_slidex" type="slide" pos="0 0 0" axis="1 0 0" range="-10.3213 10.3" damping="0.5"/>
            <joint name="goal_slidey" type="slide" pos="0 0 0" axis="0 1 0" range="-10.3213 10.3" damping="0.5"/>
        </body>

    <!-- <geom conaffinity="0" contype="0" density="0.00001" name="object0" pos="-0.384949 0.226851 -0.1" rgba="0.551315 0.719469 0.423106 1" size="0.1 0.1 0.1" type="cylinder" /><geom conaffinity="0" contype="0" density="0.00001" name="object1" pos="0.865376 0.684830 -0.1" rgba="0.480932 0.392118 0.343178 1" size="0.1 0.1 0.1" type="cylinder" /><geom conaffinity="0" contype="0" density="0.00001" name="object2" pos="0.412289 0.438572 -0.1" rgba="0.059678 0.398044 0.737995 1" size="0.1 0.1 0.1" type="cylinder" /><geom conaffinity="0" contype="0" density="0.00001" name="object3" pos="-0.571515 0.175452 -0.1" rgba="0.531551 0.531828 0.634401 1" size="0.1 0.1 0.1" type="cylinder" /><geom conaffinity="0" contype="0" density="0.00001" name="object4" pos="-0.71515 0.075452 -0.1" rgba="0.531551 0.531828 0.634401 1" size="0.1 0.1 0.1" type="cylinder" /> -->
    </worldbody>

    <actuator>
        <motor joint="proximal_j_1" ctrlrange="-3 3" ctrllimited="true"/>
        <motor joint="distal_j_1" ctrlrange="-3 3" ctrllimited="true"/>
        <motor joint="distal_j_2" ctrlrange="-3 3" ctrllimited="true"/>
        <!--<motor joint="distal_j_3" ctrlrange="-3 3" ctrllimited="true"/>-->
    </actuator>
</mujoco>
