# Supplementary material
Source: ML conference proceedings conference paper supplement (https://proceedings.mlr.press/v139/xie21c.html)
Supplement: Supplementary file 2 [file xie21c-supp.zip › supplement/code/softlearning/models/simple_maze_ant.xml]

<mujoco model="ant">
  <compiler inertiafromgeom="true" angle="degree" coordinate="local" />
  <option timestep="0.02" integrator="RK4" />
  <custom>
    <numeric name="init_qpos" data="0.0 0.0 0.55 1.0 0.0 0.0 0.0 0.0 1.0 0.0 -1.0 0.0 -1.0 0.0 1.0" />
  </custom>
  <default>
    <joint limited="true" armature="1" damping="1" />
    <geom condim="3" conaffinity="0" margin="0.01" friction="1 0.5 0.5" solref=".02 1" solimp=".8 .8 .01" rgba="0.8 0.6 0.4 1" density="5.0" />
  </default>
  <asset>
    <texture type="skybox" builtin="gradient" width="100" height="100" rgb1="1 1 1" rgb2="0 0 0" />
    <texture name="texgeom" type="cube" builtin="flat" mark="cross" width="127" height="1278" rgb1="0.8 0.6 0.4" rgb2="0.8 0.6 0.4" markrgb="1 1 1" random="0.01" />
    <texture name="texplane" type="2d" builtin="checker" rgb1="0 0 0" rgb2="0.8 0.8 0.8" width="100" height="100" />
    <material name='MatPlane' texture="texplane" shininess="1" texrepeat="60 60" specular="1"  reflectance="0.5" />
    <material name='geom' texture="texgeom" texuniform="true" />
  </asset>
  <worldbody>
    <light directional="true" cutoff="100" exponent="1" diffuse="1 1 1" specular=".1 .1 .1" pos="0 0 1.3" dir="-0 0 -1.3" />
    <geom name='floor' material="MatPlane" pos='0 0 0' size='40 40 40' type='plane' conaffinity='1' rgba='0.8 0.9 0.8 1' condim='3' />
    <body name="torso" pos="0 0 0.75">
      <geom name="torso_geom" type="sphere" size="0.25" pos="0 0 0" />
      <joint name="root" type="free" limited="false" pos="0 0 0" axis="0 0 1" margin="0.01" armature="0" damping="0" />
      <body name="front_left_leg" pos="0 0 0">
        <geom name="aux_1_geom" type="capsule" size="0.08" fromto="0.0 0.0 0.0 0.2 0.2 0.0" />
        <body name="aux_1" pos="0.2 0.2 0">
          <joint name="hip_1" type="hinge" pos="0.0 0.0 0.0" axis="0 0 1" range="-30 30" />
          <geom name="left_leg_geom" type="capsule" size="0.08" fromto="0.0 0.0 0.0 0.2 0.2 0.0" />
          <body pos="0.2 0.2 0">
            <joint name="ankle_1" type="hinge" pos="0.0 0.0 0.0" axis="-1 1 0" range="30 70" />
            <geom name="left_ankle_geom" type="capsule" size="0.08" fromto="0.0 0.0 0.0 0.4 0.4 0.0" />
          </body>
        </body>
      </body>
      <body name="front_right_leg" pos="0 0 0">
        <geom name="aux_2_geom" type="capsule" size="0.08" fromto="0.0 0.0 0.0 -0.2 0.2 0.0" />
        <body name="aux_2" pos="-0.2 0.2 0">
          <joint name="hip_2" type="hinge" pos="0.0 0.0 0.0" axis="0 0 1" range="-30 30" />
          <geom name="right_leg_geom" type="capsule" size="0.08" fromto="0.0 0.0 0.0 -0.2 0.2 0.0" />
          <body pos="-0.2 0.2 0">
            <joint name="ankle_2" type="hinge" pos="0.0 0.0 0.0" axis="1 1 0" range="-70 -30" />
            <geom name="right_ankle_geom" type="capsule" size="0.08" fromto="0.0 0.0 0.0 -0.4 0.4 0.0" />
          </body>
        </body>
      </body>
      <body name="back_leg" pos="0 0 0">
        <geom name="aux_3_geom" type="capsule" size="0.08" fromto="0.0 0.0 0.0 -0.2 -0.2 0.0" />
        <body name="aux_3" pos="-0.2 -0.2 0">
          <joint name="hip_3" type="hinge" pos="0.0 0.0 0.0" axis="0 0 1" range="-30 30" />
          <geom name="back_leg_geom" type="capsule" size="0.08" fromto="0.0 0.0 0.0 -0.2 -0.2 0.0" />
          <body pos="-0.2 -0.2 0">
            <joint name="ankle_3" type="hinge" pos="0.0 0.0 0.0" axis="-1 1 0" range="-70 -30" />
            <geom name="third_ankle_geom" type="capsule" size="0.08" fromto="0.0 0.0 0.0 -0.4 -0.4 0.0" />
          </body>
        </body>
      </body>
      <body name="right_back_leg" pos="0 0 0">
        <geom name="aux_4_geom" type="capsule" size="0.08" fromto="0.0 0.0 0.0 0.2 -0.2 0.0" />
        <body name="aux_4" pos="0.2 -0.2 0">
          <joint name="hip_4" type="hinge" pos="0.0 0.0 0.0" axis="0 0 1" range="-30 30" />
          <geom name="rightback_leg_geom" type="capsule" size="0.08" fromto="0.0 0.0 0.0 0.2 -0.2 0.0" />
          <body pos="0.2 -0.2 0">
            <joint name="ankle_4" type="hinge" pos="0.0 0.0 0.0" axis="1 1 0" range="30 70" />
            <geom name="fourth_ankle_geom" type="capsule" size="0.08" fromto="0.0 0.0 0.0 0.4 -0.4 0.0" />
          </body>
        </body>
      </body>
    </body>

    <geom name="wall-0" pos="3.5 2.5 0.5" rgba="1. 1. 1. 1" type="box" size="5.5 0.5 1" density='0.00001' contype="1" conaffinity="1"/>
    <geom name="wall-1" pos="8.5 -2.5 0.5" rgba="1. 1. 1. 1" type="box" size="0.5 5.5 1" density='0.00001' contype="1" conaffinity="1"/>
    <geom name="wall-2" pos="6 -7.5 0.5" rgba="1. 1. 1. 1" type="box" size="3 0.5 1" density='0.00001' contype="1" conaffinity="1"/>
    <geom name="wall-3" pos="3.5 -5 0.5" rgba="1. 1. 1. 1" type="box" size="0.5 3 1" density='0.00001' contype="1" conaffinity="1"/>
    <geom name="wall-4" pos="1 -2.5 0.5" rgba="1. 1. 1. 1" type="box" size="3 0.5 1" density='0.00001' contype="1" conaffinity="1"/>
    <geom name="wall-5" pos="-1.5 0 0.5" rgba="1. 1. 1. 1" type="box" size="0.5 3 1" density='0.00001' contype="1" conaffinity="1"/>
    <geom name="target" pos="6 -6 0" rgba="0 1 0 0.2" type="sphere" size="2"/>

  </worldbody>
  <actuator>
    <motor joint="hip_4" ctrlrange="-150.0 150.0" ctrllimited="true" />
    <motor joint="ankle_4" ctrlrange="-150.0 150.0" ctrllimited="true" />
    <motor joint="hip_1" ctrlrange="-150.0 150.0" ctrllimited="true" />
    <motor joint="ankle_1" ctrlrange="-150.0 150.0" ctrllimited="true" />
    <motor joint="hip_2" ctrlrange="-150.0 150.0" ctrllimited="true" />
    <motor joint="ankle_2" ctrlrange="-150.0 150.0" ctrllimited="true" />
    <motor joint="hip_3" ctrlrange="-150.0 150.0" ctrllimited="true" />
    <motor joint="ankle_3" ctrlrange="-150.0 150.0" ctrllimited="true" />
  </actuator>
</mujoco>
