# Supplementary material
Source: ML conference proceedings conference paper supplement (https://proceedings.mlr.press/v139/xie21c.html)
Supplement: Supplementary file 2 [file xie21c-supp.zip › supplement/code/softlearning/softlearning.egg-info/entry_points.txt]

[console_scripts]
softlearning = softlearning.scripts.console_scripts:main
