# Supplementary material
Source: ML conference proceedings conference paper supplement (https://proceedings.mlr.press/v139/xie21c.html)
Supplement: Supplementary file 2 [file xie21c-supp.zip › supplement/code/softlearning/softlearning.egg-info/PKG-INFO]

Metadata-Version: 1.0
Name: softlearning
Version: 0.0.1
Summary: Softlearning is a deep reinforcement learning toolbox for training maximum entropy policies in continuous domains.
Home-page: https://github.com/rail-berkeley/softlearning
Author: Kristian Hartikainen
Author-email: kristian.hartikainen@gmail.com
License: MIT
Description: UNKNOWN
Keywords: softlearning,soft-actor-critic,sac,soft-q-learning,sql,machine-learning,reinforcement-learning,deep-learning,python
Platform: UNKNOWN
