# Supplementary material
Source: ML conference proceedings conference paper supplement (https://proceedings.mlr.press/v139/xie21c.html)
Supplement: Supplementary file 2 [file xie21c-supp.zip › supplement/code/softlearning/softlearning.egg-info/SOURCES.txt]

setup.py
examples/__init__.py
examples/instrument.py
examples/utils.py
examples/development/__init__.py
examples/development/main.py
examples/development/simulate_policy.py
examples/development/variants.py
examples/multi_goal/__init__.py
examples/multi_goal/main.py
examples/multi_goal/variants.py
scripts/__init__.py
scripts/archive_gs.py
scripts/install_mujoco.py
scripts/sync_gs.py
softlearning/__init__.py
softlearning.egg-info/PKG-INFO
softlearning.egg-info/SOURCES.txt
softlearning.egg-info/dependency_links.txt
softlearning.egg-info/entry_points.txt
softlearning.egg-info/top_level.txt
softlearning.egg-info/zip-safe
softlearning/algorithms/__init__.py
softlearning/algorithms/rl_algorithm.py
softlearning/algorithms/sac.py
softlearning/algorithms/sql.py
softlearning/algorithms/utils.py
softlearning/distributions/__init__.py
softlearning/distributions/real_nvp_flow.py
softlearning/distributions/squash_bijector.py
softlearning/environments/__init__.py
softlearning/environments/helpers.py
softlearning/environments/utils.py
softlearning/environments/adapters/__init__.py
softlearning/environments/adapters/dm_control_adapter.py
softlearning/environments/adapters/gym_adapter.py
softlearning/environments/adapters/robosuite_adapter.py
softlearning/environments/adapters/softlearning_env.py
softlearning/environments/dm_control/__init__.py
softlearning/environments/gym/__init__.py
softlearning/environments/gym/multi_goal.py
softlearning/environments/gym/mujoco/__init__.py
softlearning/environments/gym/mujoco/image_pusher_2d.py
softlearning/environments/gym/mujoco/pusher_2d.py
softlearning/environments/gym/robotics/__init__.py
softlearning/environments/gym/wrappers/__init__.py
softlearning/environments/gym/wrappers/normalize_action.py
softlearning/environments/gym/wrappers/pixel_observation.py
softlearning/misc/__init__.py
softlearning/misc/kernel.py
softlearning/misc/plotter.py
softlearning/misc/utils.py
softlearning/models/__init__.py
softlearning/models/convnet.py
softlearning/models/feedforward.py
softlearning/models/normalization.py
softlearning/models/utils.py
softlearning/policies/__init__.py
softlearning/policies/base_policy.py
softlearning/policies/gaussian_policy.py
softlearning/policies/uniform_policy.py
softlearning/policies/utils.py
softlearning/preprocessors/__init__.py
softlearning/preprocessors/utils.py
softlearning/replay_pools/__init__.py
softlearning/replay_pools/flexible_replay_pool.py
softlearning/replay_pools/goal_replay_pool.py
softlearning/replay_pools/hindsight_experience_replay_pool.py
softlearning/replay_pools/multitask_replay_pool.py
softlearning/replay_pools/replay_pool.py
softlearning/replay_pools/simple_replay_pool.py
softlearning/replay_pools/union_pool.py
softlearning/replay_pools/utils.py
softlearning/samplers/__init__.py
softlearning/samplers/base_sampler.py
softlearning/samplers/dummy_sampler.py
softlearning/samplers/goal_sampler.py
softlearning/samplers/remote_sampler.py
softlearning/samplers/simple_sampler.py
softlearning/samplers/utils.py
softlearning/scripts/__init__.py
softlearning/scripts/console_scripts.py
softlearning/value_functions/__init__.py
softlearning/value_functions/utils.py
softlearning/value_functions/value_function.py
softlearning/value_functions/vanilla.py
