# Supplementary material
Source: ML conference proceedings conference paper supplement (https://proceedings.mlr.press/v139/xie21c.html)
Supplement: Supplementary file 2 [file xie21c-supp.zip › supplement/code/softlearning/softlearning/algorithms/rl_algorithm.py]

import abc
from collections import OrderedDict
from distutils.version import LooseVersion
from itertools import count
import gtimer as gt
import math
import os

import numpy as np
import tensorflow as tf
from tensorflow.python.training import training_util

from softlearning.samplers import rollouts
from softlearning.misc.utils import save_video


if LooseVersion(tf.__version__) > LooseVersion("2.00"):
    from tensorflow.python.training.tracking.tracking import (
        AutoTrackable as Checkpointable)
else:
    from tensorflow.contrib.checkpoint import Checkpointable


class RLAlgorithm(Checkpointable):
    """Abstract RLAlgorithm.

    Implements the _train and _evaluate methods to be used
    by classes inheriting from RLAlgorithm.
    """

    def __init__(
            self,
            sampler,
            n_epochs=1000,
            train_every_n_steps=1,
            n_train_repeat=1,
            max_train_repeat_per_timestep=5,
            n_initial_exploration_steps=0,
            initial_exploration_policy=None,
            epoch_length=1000,
            eval_n_episodes=10,
            eval_deterministic=True,
            eval_render_kwargs=None,
            video_save_frequency=0,
            session=None,

            latent_dim=0,
            max_episodes=2000,
    ):
        """
        Args:
            n_epochs (`int`): Number of epochs to run the training for.
            n_train_repeat (`int`): Number of times to repeat the training
                for single time step.
            n_initial_exploration_steps: Number of steps in the beginning to
                take using actions drawn from a separate exploration policy.
            epoch_length (`int`): Epoch length.
            eval_n_episodes (`int`): Number of rollouts to evaluate.
            eval_deterministic (`int`): Whether or not to run the policy in
                deterministic mode when evaluating policy.
            eval_render_kwargs (`None`, `dict`): Arguments to be passed for
                rendering evaluation rollouts. `None` to disable rendering.
        """
        self.sampler = sampler

        self._n_epochs = n_epochs
        self._n_train_repeat = n_train_repeat
        self._max_train_repeat_per_timestep = max(
            max_train_repeat_per_timestep, n_train_repeat)
        self._train_every_n_steps = train_every_n_steps
        self._epoch_length = epoch_length
        self._n_initial_exploration_steps = n_initial_exploration_steps
        self._initial_exploration_policy = initial_exploration_policy

        self._eval_n_episodes = eval_n_episodes
        self._eval_deterministic = eval_deterministic
        self._video_save_frequency = video_save_frequency

        self._eval_render_kwargs = eval_render_kwargs or {}

        if self._video_save_frequency > 0:
            render_mode = self._eval_render_kwargs.pop('mode', 'rgb_array')
            assert render_mode != 'human', (
                "RlAlgorithm cannot render and save videos at the same time")
            self._eval_render_kwargs['mode'] = render_mode

        self._session = session or tf.keras.backend.get_session()

        self._max_episodes = max_episodes
        self._latent_dim = latent_dim

        self._epoch = 0
        self._timestep = 0
        self._num_train_steps = 0

    def _build(self):
        self._training_ops = {}

        self._init_global_step()
        self._init_placeholders()

    def _init_global_step(self):
        self.global_step = training_util.get_or_create_global_step()
        self._training_ops.update({
            'increment_global_step': training_util._increment_global_step(1)
        })

    def _init_placeholders(self):
        """Create input placeholders for the SAC algorithm.

        Creates `tf.placeholder`s for:
            - observation
            - next observation
            - action
            - reward
            - terminals
        """
        self._placeholders = {
            'observations': {
                name: tf.compat.v1.placeholder(
                    dtype=(
                        np.float32
                        if np.issubdtype(observation_space.dtype, np.floating)
                        else observation_space.dtype
                    ),
                    shape=(None, *observation_space.shape),
                    name=name)
                for name, observation_space
                in self._training_environment.observation_space.spaces.items()
            },
            'next_observations': {
                name: tf.compat.v1.placeholder(
                    dtype=(
                        np.float32
                        if np.issubdtype(observation_space.dtype, np.floating)
                        else observation_space.dtype
                    ),
                    shape=(None, *observation_space.shape),
                    name=name)
                for name, observation_space
                in self._training_environment.observation_space.spaces.items()
            },
            'actions': tf.compat.v1.placeholder(
                dtype=tf.float32,
                shape=(None, *self._training_environment.action_space.shape),
                name='actions',
            ),
            'rewards': tf.compat.v1.placeholder(
                tf.float32,
                shape=(None, 1),
                name='rewards',
            ),
            'terminals': tf.compat.v1.placeholder(
                tf.bool,
                shape=(None, 1),
                name='terminals',
            ),
            'episodes': tf.compat.v1.placeholder(
                tf.int64,
                shape=(None, 1),
                name='episodes',
            ),
            'iteration': tf.compat.v1.placeholder(
                tf.int64, shape=(), name='iteration',
            ),
            'beta': tf.compat.v1.placeholder(
                tf.float32, shape=(), name='beta',
            ),
        }
        if self._latent_dim > 0:
            self._placeholders.update({
                'cached_latents': tf.compat.v1.placeholder(
                    tf.float32,
                    shape=(self._max_episodes, self._latent_dim),
                    name='cached_latents')
            })

    def _initial_exploration_hook(self, env, initial_exploration_policy, pool):
        if self._n_initial_exploration_steps < 1: return

        if not initial_exploration_policy:
            raise ValueError(
                "Initial exploration policy must be provided when"
                " n_initial_exploration_steps > 0.")

        self.sampler.initialize(env, initial_exploration_policy, pool)
        while pool.size < self._n_initial_exploration_steps:
            self.sampler.sample()

    def _training_before_hook(self):
        """Method called before the actual training loops."""
        pass

    def _training_after_hook(self):
        """Method called after the actual training loops."""
        pass

    def _timestep_before_hook(self, *args, **kwargs):
        """Hook called at the beginning of each timestep."""
        pass

    def _timestep_after_hook(self, *args, **kwargs):
        """Hook called at the end of each timestep."""
        pass

    def _epoch_before_hook(self):
        """Hook called at the beginning of each epoch."""
        self._train_steps_this_epoch = 0

    def _epoch_after_hook(self, *args, **kwargs):
        """Hook called at the end of each epoch."""
        pass

    def _training_batch(self, batch_size=None):
        return self.sampler.random_batch(batch_size)

    def _evaluation_batch(self, *args, **kwargs):
        return self._training_batch(*args, **kwargs)

    @property
    def _training_started(self):
        return self._total_timestep > 0

    @property
    def _total_timestep(self):
        total_timestep = self._epoch * self._epoch_length + self._timestep
        return total_timestep

    def train(self, *args, **kwargs):
        """Initiate training of the SAC instance."""
        return self._train(*args, **kwargs)

    def _train(self):
        """Return a generator that performs RL training.

        Args:
            env (`SoftlearningEnv`): Environment used for training.
            policy (`Policy`): Policy used for training
            initial_exploration_policy ('Policy'): Policy used for exploration
                If None, then all exploration is done using policy
            pool (`PoolBase`): Sample pool to add samples to
        """
        training_environment = self._training_environment
        evaluation_environment = self._evaluation_environment
        policy = self._policy
        pool = self._pool

        if not self._training_started:
            self._init_training()

            self._initial_exploration_hook(
                training_environment, self._initial_exploration_policy, pool)

        self.sampler.initialize(training_environment, policy, pool)

        gt.reset_root()
        gt.rename_root('RLAlgorithm')
        gt.set_def_unique(False)

        self._training_before_hook()

        for self._epoch in gt.timed_for(range(self._epoch, self._n_epochs)):
            self._epoch_before_hook()
            gt.stamp('epoch_before_hook')

            start_samples = self.sampler._total_samples
            for i in count():
                samples_now = self.sampler._total_samples
                self._timestep = samples_now - start_samples

                if (samples_now >= start_samples + self._epoch_length
                    and self.ready_to_train):
                    break

                self._timestep_before_hook()
                gt.stamp('timestep_before_hook')

                self._do_sampling(timestep=self._total_timestep)
                gt.stamp('sample')

                if self.ready_to_train:
                    self._do_training_repeats(timestep=self._total_timestep)
                gt.stamp('train')

                self._timestep_after_hook()
                gt.stamp('timestep_after_hook')

            training_paths = self.sampler.get_last_n_paths(
                math.ceil(self._epoch_length / self.sampler._max_path_length))
            gt.stamp('training_paths')
            evaluation_paths = self._evaluation_paths(
                policy, evaluation_environment)
            gt.stamp('evaluation_paths')

            training_metrics = self._evaluate_rollouts(
                training_paths, training_environment)
            gt.stamp('training_metrics')
            if evaluation_paths:
                evaluation_metrics = self._evaluate_rollouts(
                    evaluation_paths, evaluation_environment)
                gt.stamp('evaluation_metrics')
            else:
                evaluation_metrics = {}

            self._epoch_after_hook(training_paths)
            gt.stamp('epoch_after_hook')

            sampler_diagnostics = self.sampler.get_diagnostics()

            diagnostics = self.get_diagnostics(
                iteration=self._total_timestep,
                batch=self._evaluation_batch(),
                training_paths=training_paths,
                evaluation_paths=evaluation_paths)

            time_diagnostics = gt.get_times().stamps.itrs

            diagnostics.update(OrderedDict((
                *(
                    (f'evaluation/{key}', evaluation_metrics[key])
                    for key in sorted(evaluation_metrics.keys())
                ),
                *(
                    (f'training/{key}', training_metrics[key])
                    for key in sorted(training_metrics.keys())
                ),
                *(
                    (f'times/{key}', time_diagnostics[key][-1])
                    for key in sorted(time_diagnostics.keys())
                ),
                *(
                    (f'sampler/{key}', sampler_diagnostics[key])
                    for key in sorted(sampler_diagnostics.keys())
                ),
                ('epoch', self._epoch),
                ('timestep', self._timestep),
                ('timesteps_total', self._total_timestep),
                ('train-steps', self._num_train_steps),
            )))

            if self._eval_render_kwargs and hasattr(
                    evaluation_environment, 'render_rollouts'):
                # TODO(hartikainen): Make this consistent such that there's no
                # need for the hasattr check.
                training_environment.render_rollouts(evaluation_paths)

            yield diagnostics

        self.sampler.terminate()

        self._training_after_hook()

        yield {'done': True, **diagnostics}

    def _evaluation_paths(self, policy, evaluation_env):
        if self._eval_n_episodes < 1: return ()

        with policy.set_deterministic(self._eval_deterministic):
            paths = rollouts(
                self._eval_n_episodes,
                evaluation_env,
                policy,
                self.sampler._max_path_length,
                algorithm=self,
                session=self._session,
                latent_dim=self._latent_dim,
                render_kwargs=self._eval_render_kwargs)

        should_save_video = (
            self._video_save_frequency > 0
            and (self._epoch == 0
                 or (self._epoch + 1) % self._video_save_frequency == 0))

        if should_save_video:
            fps = 1 // getattr(self._training_environment, 'dt', 1/30)
            for i, path in enumerate(paths):
                video_frames = path.pop('images')
                video_file_name = f'evaluation_path_{self._epoch}_{i}.mp4'
                video_file_path = os.path.join(
                    os.getcwd(), 'videos', video_file_name)
                save_video(video_frames, video_file_path, fps=fps)

        return paths

    def _evaluate_rollouts(self, episodes, env):
        """Compute evaluation metrics for the given rollouts."""

        episodes_rewards = [episode['rewards'] for episode in episodes]
        episodes_reward = [np.sum(episode_rewards)
                           for episode_rewards in episodes_rewards]
        episodes_length = [episode_rewards.shape[0]
                           for episode_rewards in episodes_rewards]

        diagnostics = OrderedDict((
            ('episode-reward-mean', np.mean(episodes_reward)),
            ('episode-reward-min', np.min(episodes_reward)),
            ('episode-reward-max', np.max(episodes_reward)),
            ('episode-reward-std', np.std(episodes_reward)),
            ('episode-length-mean', np.mean(episodes_length)),
            ('episode-length-min', np.min(episodes_length)),
            ('episode-length-max', np.max(episodes_length)),
            ('episode-length-std', np.std(episodes_length)),
        ))

        env_infos = env.get_path_infos(episodes)
        for key, value in env_infos.items():
            diagnostics[f'env_infos/{key}'] = value

        return diagnostics

    @abc.abstractmethod
    def get_diagnostics(self,
                        iteration,
                        batch,
                        training_paths,
                        evaluation_paths):
        raise NotImplementedError

    @property
    def ready_to_train(self):
        return self.sampler.batch_ready()

    def _do_sampling(self, timestep):
        self.sampler.sample()

    def _do_training_repeats(self, timestep):
        """Repeat training _n_train_repeat times every _train_every_n_steps"""
        if timestep % self._train_every_n_steps > 0: return
        trained_enough = (
            self._train_steps_this_epoch
            > self._max_train_repeat_per_timestep * self._timestep)
        if trained_enough: return

        for i in range(self._n_train_repeat):
            self._do_training(
                iteration=timestep,
                batch=self._training_batch())

        self._num_train_steps += self._n_train_repeat
        self._train_steps_this_epoch += self._n_train_repeat

    @abc.abstractmethod
    def _do_training(self, iteration, batch):
        raise NotImplementedError

    @abc.abstractmethod
    def _init_training(self):
        raise NotImplementedError

    @property
    def tf_saveables(self):
        return {}

    def __getstate__(self):
        state = {
            '_epoch_length': self._epoch_length,
            '_epoch': (
                self._epoch + int(self._timestep >= self._epoch_length)),
            '_timestep': self._timestep % self._epoch_length,
            '_num_train_steps': self._num_train_steps,
        }

        return state

    def __setstate__(self, state):
        self.__dict__.update(state)
