# Supplementary material
Source: ML conference proceedings conference paper supplement (https://proceedings.mlr.press/v139/xie21c.html)
Supplement: Supplementary file 2 [file xie21c-supp.zip › supplement/code/softlearning/softlearning/algorithms/utils.py]

from copy import deepcopy


def create_SAC_algorithm(variant, *args, **kwargs):
    from .sac import SAC

    algorithm = SAC(*args, **kwargs)

    return algorithm


def create_SQL_algorithm(variant, *args, **kwargs):
    from .sql import SQL

    algorithm = SQL(*args, **kwargs)

    return algorithm


ALGORITHM_CLASSES = {
    'SAC': create_SAC_algorithm,
    'SQL': create_SQL_algorithm,
}


def get_algorithm_from_variant(variant,
                               *args,
                               **kwargs):
    algorithm_params = variant['algorithm_params']
    algorithm_type = algorithm_params['type']
    algorithm_kwargs = deepcopy(algorithm_params['kwargs'])
    algorithm = ALGORITHM_CLASSES[algorithm_type](
        variant, *args, **algorithm_kwargs, **kwargs)

    return algorithm
