# Supplementary material
Source: ML conference proceedings conference paper supplement (https://proceedings.mlr.press/v139/xie21c.html)
Supplement: Supplementary file 2 [file xie21c-supp.zip › supplement/code/softlearning/softlearning/misc/utils.py]

import collections
import datetime
import os
import random

import tensorflow as tf
import numpy as np


PROJECT_PATH = os.path.dirname(
    os.path.realpath(os.path.join(__file__, '..', '..')))


DEFAULT_SNAPSHOT_MODE = 'none'
DEFAULT_SNAPSHOT_GAP = 1000


def initialize_tf_variables(session, only_uninitialized=True):
    variables = tf.compat.v1.global_variables() + tf.compat.v1.local_variables()

    def is_initialized(variable):
        try:
            session.run(variable)
            return True
        except tf.errors.FailedPreconditionError:
            return False

        return False

    if only_uninitialized:
        variables = [
            variable for variable in variables
            if not is_initialized(variable)
        ]

    session.run(tf.compat.v1.variables_initializer(variables))


def set_seed(seed):
    seed %= 4294967294
    random.seed(seed)
    np.random.seed(seed)
    tf.compat.v1.set_random_seed(seed)
    print("Using seed {}".format(seed))


def datetimestamp(divider='-', datetime_divider='T'):
    now = datetime.datetime.now()
    return now.strftime(
        '%Y{d}%m{d}%dT%H{d}%M{d}%S'
        ''.format(d=divider, dtd=datetime_divider))


def datestamp(divider='-'):
    return datetime.date.today().isoformat().replace('-', divider)


def timestamp(divider='-'):
    now = datetime.datetime.now()
    time_now = datetime.datetime.time(now)
    return time_now.strftime(
        '%H{d}%M{d}%S'.format(d=divider))


def concat_obs_z(obs, z, num_skills):
    """Concatenates the observation to a one-hot encoding of Z."""
    assert np.isscalar(z)
    z_one_hot = np.zeros(num_skills)
    z_one_hot[z] = 1
    return np.hstack([obs, z_one_hot])


def split_aug_obs(aug_obs, num_skills):
    """Splits an augmented observation into the observation and Z."""
    (obs, z_one_hot) = (aug_obs[:-num_skills], aug_obs[-num_skills:])
    z = np.where(z_one_hot == 1)[0][0]
    return (obs, z)


def _make_dir(filename):
    folder = os.path.dirname(filename)
    if not os.path.exists(folder):
        os.makedirs(folder)


def save_video(video_frames, filename, fps=60):
    assert fps == int(fps), fps
    import skvideo.io
    _make_dir(filename)
    skvideo.io.vwrite(filename, video_frames, inputdict={'-r': str(int(fps))})


def deep_update(d, *us):
    d = d.copy()

    for u in us:
        u = u.copy()
        for k, v in u.items():
            d[k] = (
                deep_update(d.get(k, {}), v)
                if isinstance(v, collections.Mapping)
                else v)

    return d


def get_git_rev(path=PROJECT_PATH, search_parent_directories=True):
    try:
        import git
    except ImportError:
        print(
            "Warning: gitpython not installed."
            " Unable to log git rev."
            " Run `pip install gitpython` if you want git revs to be logged.")
        return None

    try:
        repo = git.Repo(
            path, search_parent_directories=search_parent_directories)
        git_rev = repo.active_branch.commit.name_rev
    except TypeError:
        git_rev = repo.head.object.name_rev

    return git_rev


def flatten(unflattened, parent_key='', separator='.'):
    items = []
    for k, v in unflattened.items():
        if separator in k:
            raise ValueError(
                "Found separator ({}) from key ({})".format(separator, k))
        new_key = parent_key + separator + k if parent_key else k
        if isinstance(v, collections.MutableMapping) and v:
            items.extend(flatten(v, new_key, separator=separator).items())
        else:
            items.append((new_key, v))

    return dict(items)


def unflatten(flattened, separator='.'):
    result = {}
    for key, value in flattened.items():
        parts = key.split(separator)
        d = result
        for part in parts[:-1]:
            if part not in d:
                d[part] = {}
            d = d[part]
        d[parts[-1]] = value

    return result
