# Supplementary material
Source: ML conference proceedings conference paper supplement (https://proceedings.mlr.press/v139/xie21c.html)
Supplement: Supplementary file 2 [file xie21c-supp.zip › supplement/code/softlearning/softlearning/preprocessors/utils.py]

from copy import deepcopy


def get_convnet_preprocessor(name='convnet_preprocessor', **kwargs):
    from softlearning.models.convnet import convnet_model

    preprocessor = convnet_model(name=name, **kwargs)

    return preprocessor


def get_feedforward_preprocessor(name='feedforward_preprocessor', **kwargs):
    from softlearning.models.feedforward import feedforward_model

    preprocessor = feedforward_model(name=name, **kwargs)

    return preprocessor


PREPROCESSOR_FUNCTIONS = {
    'convnet_preprocessor': get_convnet_preprocessor,
    'feedforward_preprocessor': get_feedforward_preprocessor,
    None: lambda *args, **kwargs: None
}


def get_preprocessor_from_params(env, preprocessor_params, *args, **kwargs):
    if preprocessor_params is None:
        return None

    preprocessor_type = preprocessor_params.get('type', None)
    preprocessor_kwargs = deepcopy(preprocessor_params.get('kwargs', {}))

    if preprocessor_type is None:
        return None

    preprocessor = PREPROCESSOR_FUNCTIONS[
        preprocessor_type](
            *args,
            **preprocessor_kwargs,
            **kwargs)

    return preprocessor


def get_preprocessor_from_variant(variant, env, *args, **kwargs):
    preprocessor_params = variant['preprocessor_params']
    return get_preprocessor_from_params(
        env, preprocessor_params, *args, **kwargs)
