# Supplementary material
Source: ML conference proceedings conference paper supplement (https://proceedings.mlr.press/v139/xie21c.html)
Supplement: Supplementary file 2 [file xie21c-supp.zip › supplement/code/softlearning/softlearning/replay_pools/__init__.py]

from .simple_replay_pool import SimpleReplayPool
from .union_pool import UnionPool
