# Supplementary material
Source: ML conference proceedings conference paper supplement (https://proceedings.mlr.press/v139/xie21c.html)
Supplement: Supplementary file 2 [file xie21c-supp.zip › supplement/code/softlearning/softlearning/samplers/__init__.py]

from .base_sampler import BaseSampler
from .dummy_sampler import DummySampler
from .simple_sampler import SimpleSampler
from .remote_sampler import RemoteSampler
from .utils import rollout, rollouts
