# Supplementary material
Source: ML conference proceedings conference paper supplement (https://proceedings.mlr.press/v139/xie21c.html)
Supplement: Supplementary file 2 [file xie21c-supp.zip › supplement/code/softlearning/softlearning/samplers/base_sampler.py]

from collections import deque, OrderedDict
from itertools import islice


class BaseSampler(object):
    def __init__(self,
                 max_path_length,
                 min_pool_size,
                 batch_size,
                 store_last_n_paths=10,
                 session=None):
        self._max_path_length = max_path_length
        self._min_pool_size = min_pool_size
        self._batch_size = batch_size
        self._store_last_n_paths = store_last_n_paths
        self._last_n_paths = deque(maxlen=store_last_n_paths)
        self._session = session

        self.env = None
        self.policy = None
        self.pool = None

    def initialize(self, env, policy, pool):
        self.env = env
        self.policy = policy
        self.pool = pool

    def set_policy(self, policy):
        self.policy = policy

    def clear_last_n_paths(self):
        self._last_n_paths.clear()

    def get_last_n_paths(self, n=None):
        if n is None:
            n = self._store_last_n_paths

        last_n_paths = tuple(islice(self._last_n_paths, None, n))

        return last_n_paths

    def sample(self):
        raise NotImplementedError

    def batch_ready(self):
        enough_samples = self.pool.size >= self._min_pool_size
        return enough_samples

    def random_batch(self, batch_size=None, **kwargs):
        batch_size = batch_size or self._batch_size
        return self.pool.random_batch(batch_size, **kwargs)

    def terminate(self):
        self.env.close()

    def get_diagnostics(self):
        diagnostics = OrderedDict({'pool-size': self.pool.size})
        return diagnostics

    def __getstate__(self):
        state = {
            key: value for key, value in self.__dict__.items()
            if key not in ('env', 'policy', 'pool')
        }

        return state

    def __setstate__(self, state):
        self.__dict__.update(state)

        self.env = None
        self.policy = None
        self.pool = None
