# Supplementary material
Source: ML conference proceedings conference paper supplement (https://proceedings.mlr.press/v139/xie21c.html)
Supplement: Supplementary file 2 [file xie21c-supp.zip › supplement/code/softlearning/softlearning/samplers/dummy_sampler.py]

from .base_sampler import BaseSampler


class DummySampler(BaseSampler):
    def __init__(self, batch_size, max_path_length):
        super(DummySampler, self).__init__(
            max_path_length=max_path_length,
            min_pool_size=0,
            batch_size=batch_size)

    def sample(self):
        pass
