# Supplementary material
Source: ML conference proceedings conference paper supplement (https://proceedings.mlr.press/v139/xie21c.html)
Supplement: Supplementary file 2 [file xie21c-supp.zip › supplement/code/softlearning/softlearning/utils/numpy.py]

import numpy as np


def softmax(x):
    max_x = np.max(x)
    exp_x = np.exp(x - max_x)
    return exp_x / np.sum(exp_x)
