# Supplementary material
Source: ML conference proceedings conference paper supplement (https://proceedings.mlr.press/v139/xie21c.html)
Supplement: Supplementary file 2 [file xie21c-supp.zip › supplement/code/softlearning/softlearning/utils/tensorflow.py]

from distutils.version import LooseVersion

import tensorflow as tf


if LooseVersion(tf.__version__) > LooseVersion("2.00"):
    from tensorflow import nest
else:
    from tensorflow.contrib.framework import nest
