# Supplementary material
Source: ML conference proceedings conference paper supplement (https://proceedings.mlr.press/v139/xie21c.html)
Supplement: Supplementary file 2 [file xie21c-supp.zip › supplement/code/softlearning/softlearning/value_functions/value_function.py]

import tensorflow as tf
import numpy as np

from serializable import Serializable


class SumQFunction(Serializable):
    def __init__(self,
                 observation_shape,
                 action_shape,
                 q_functions):
        self._Serializable__initialize(locals())

        self.q_functions = q_functions

        assert len(observation_shape) == 1, observation_shape
        self._Do = observation_shape[0]
        assert len(action_shape) == 1, action_shape
        self._Da = action_shape[0]

        self._observations_ph = tf.compat.v1.placeholder(
            tf.float32, shape=(None, self._Do), name='observations')
        self._actions_ph = tf.compat.v1.placeholder(
            tf.float32, shape=(None, self._Da), name='actions')

        self._output = self.output_for(
            self._observations_ph, self._actions_ph, reuse=True)

    def output_for(self, observations, actions, reuse=False):
        outputs = [
            qf.output_for(observations, actions, reuse=reuse)
            for qf in self.q_functions
        ]
        output = tf.add_n(outputs)
        return output

    def _eval(self, observations, actions):
        feeds = {
            self._observations_ph: observations,
            self._actions_ph: actions
        }

        return tf.compat.v1.keras.backend.get_session().run(self._output, feeds)

    def get_param_values(self):
        all_values_list = [qf.get_param_values() for qf in self.q_functions]

        return np.concatenate(all_values_list)

    def set_param_values(self, all_values):
        param_sizes = [qf.get_param_values().size for qf in self.q_functions]
        split_points = np.cumsum(param_sizes)[:-1]

        all_values_list = np.split(all_values, split_points)

        for values, qf in zip(all_values_list, self.q_functions):
            qf.set_param_values(values)
